# Supplementary material for: Systematic comparative analysis of single cell RNA-sequencing methods
Source: bioRxiv or medRxiv preprint supplement (doi:10.1101/632216), 2019-05-23

# Supp. Fig. 1

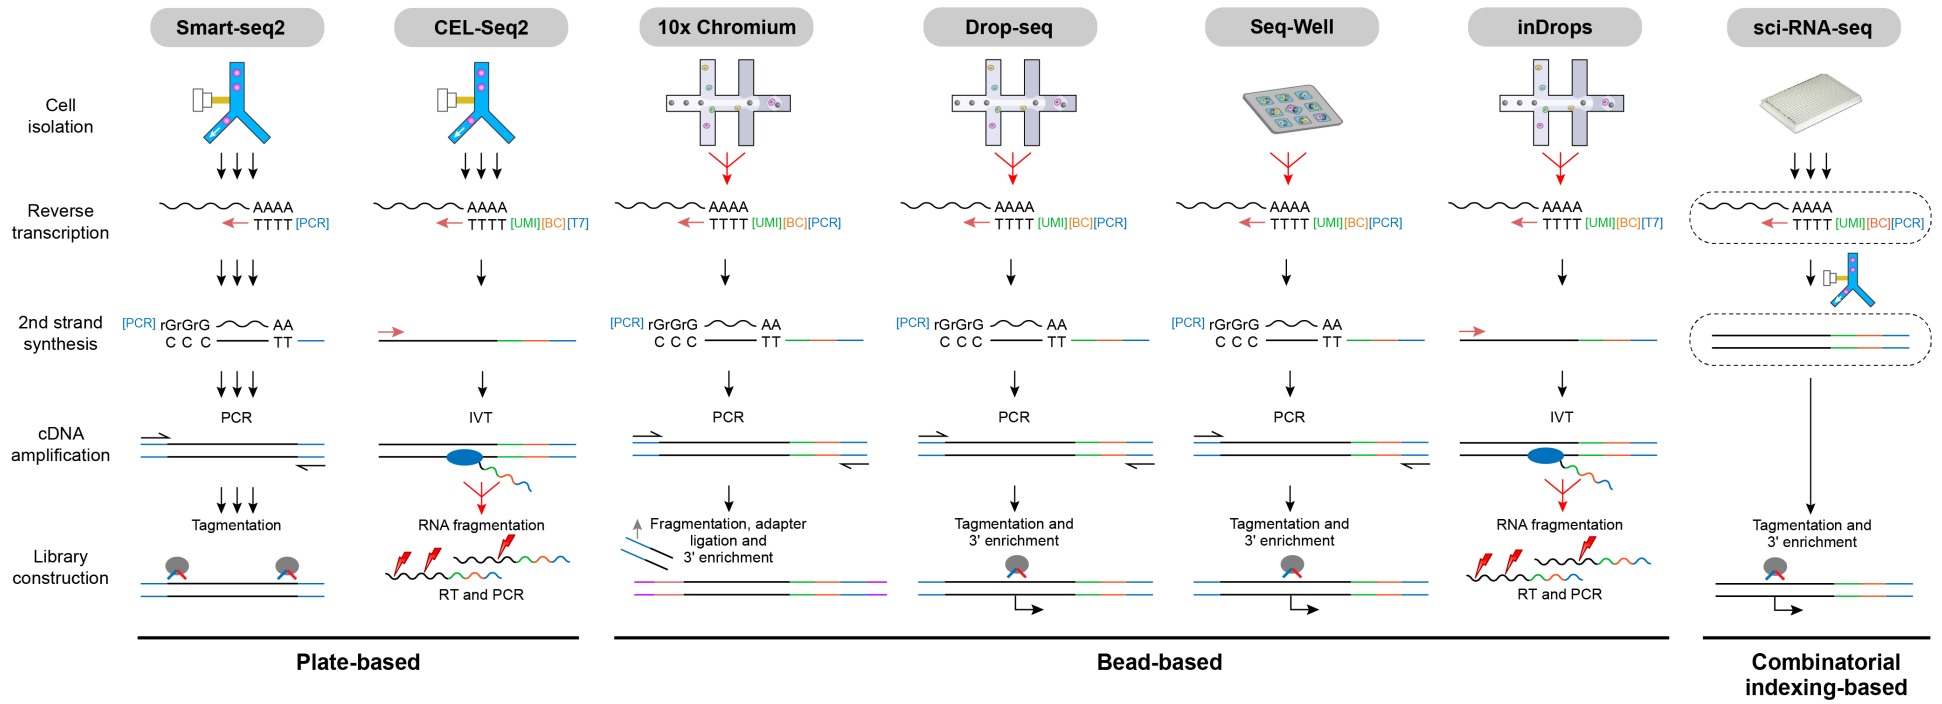

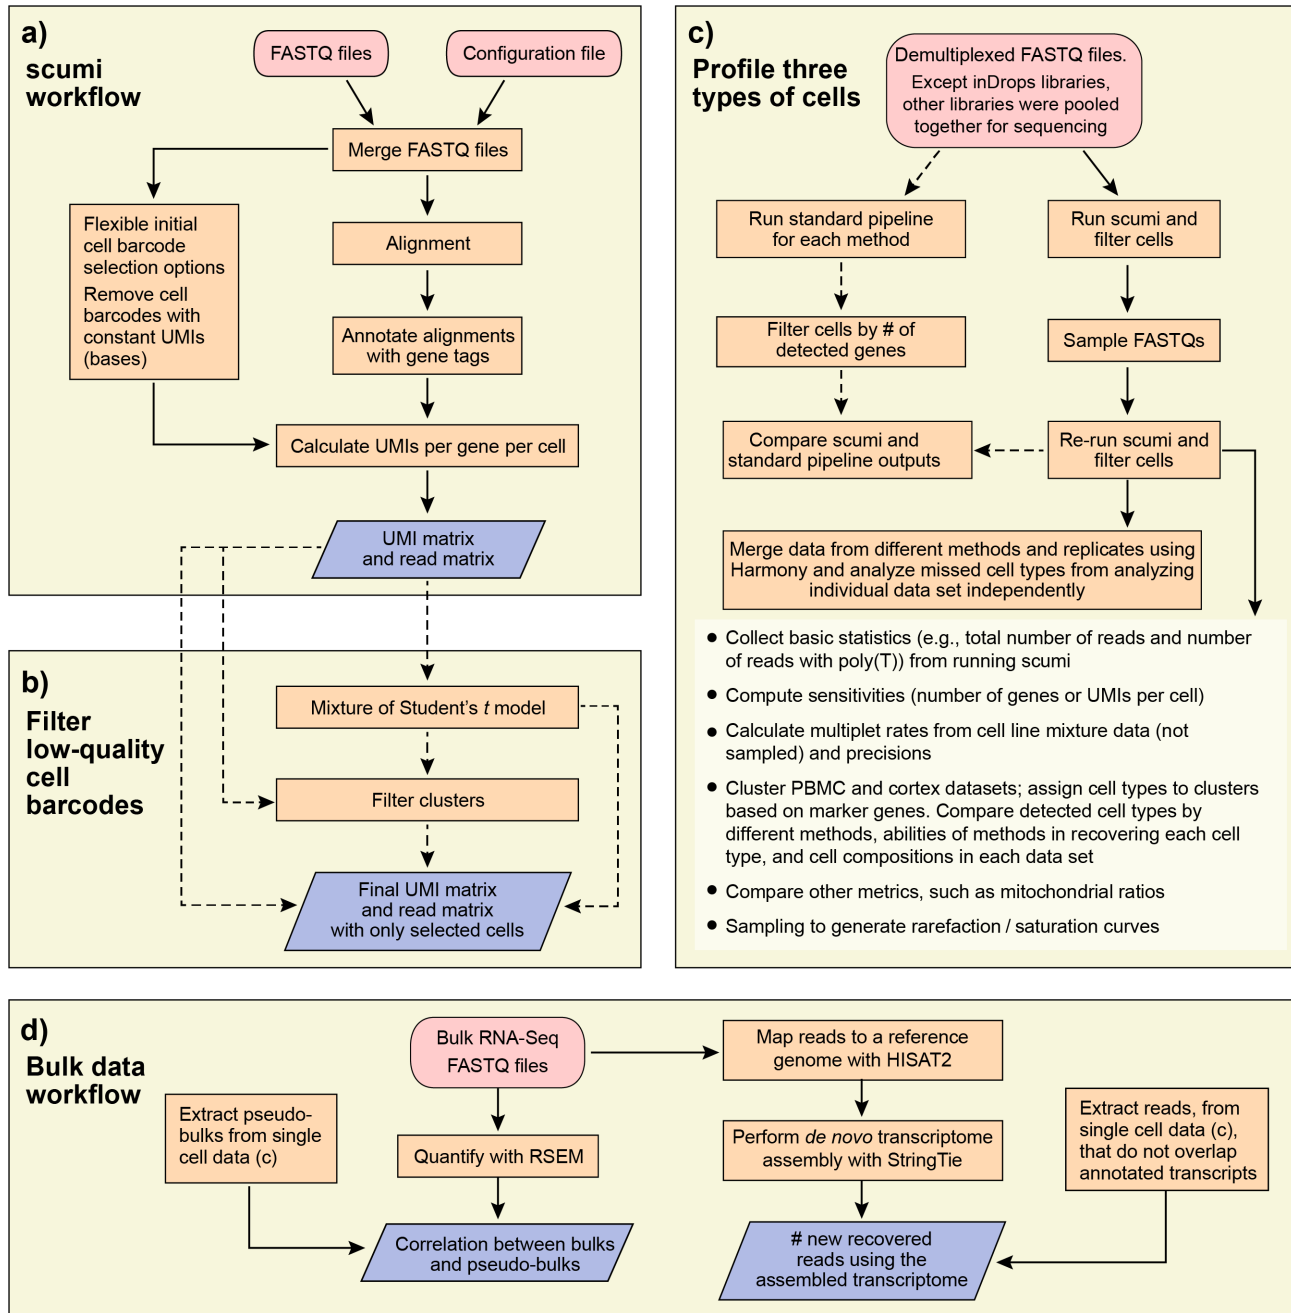

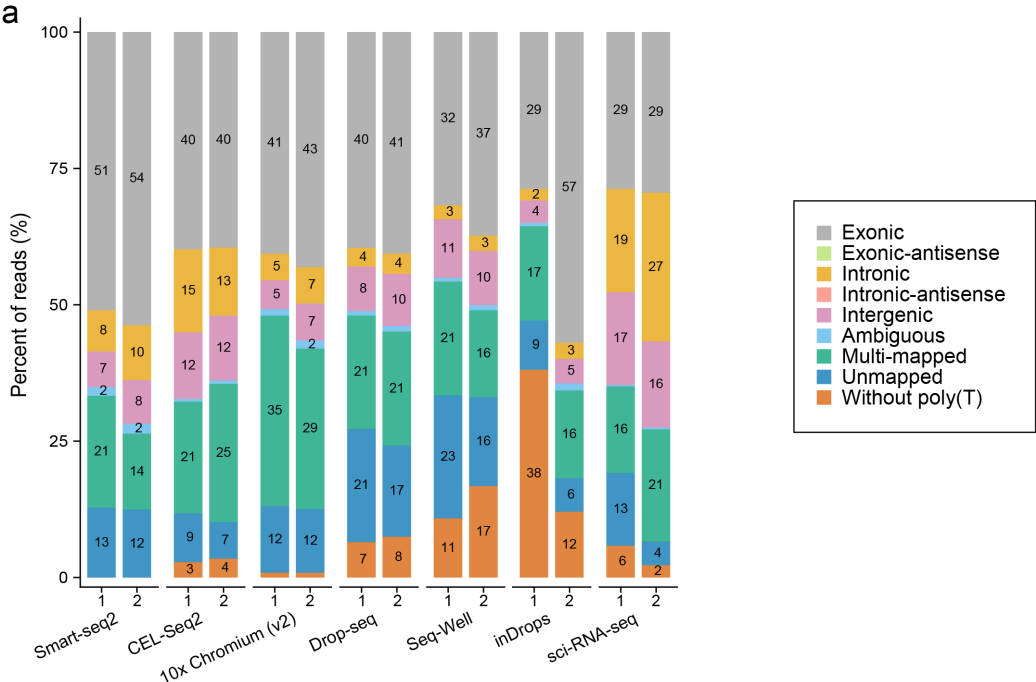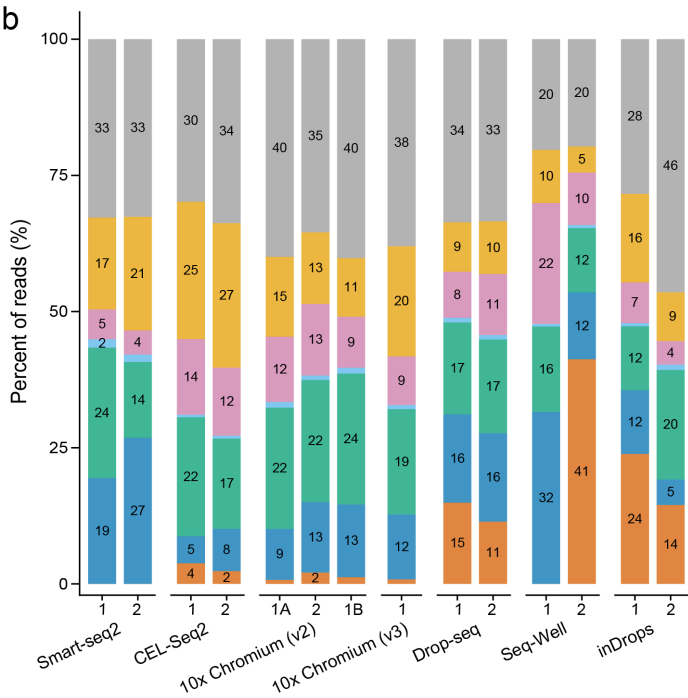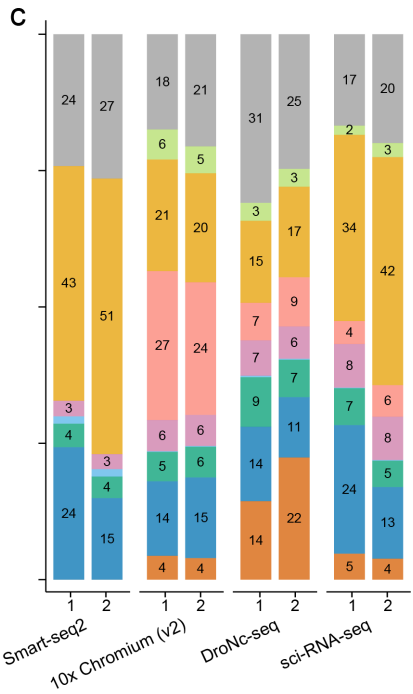

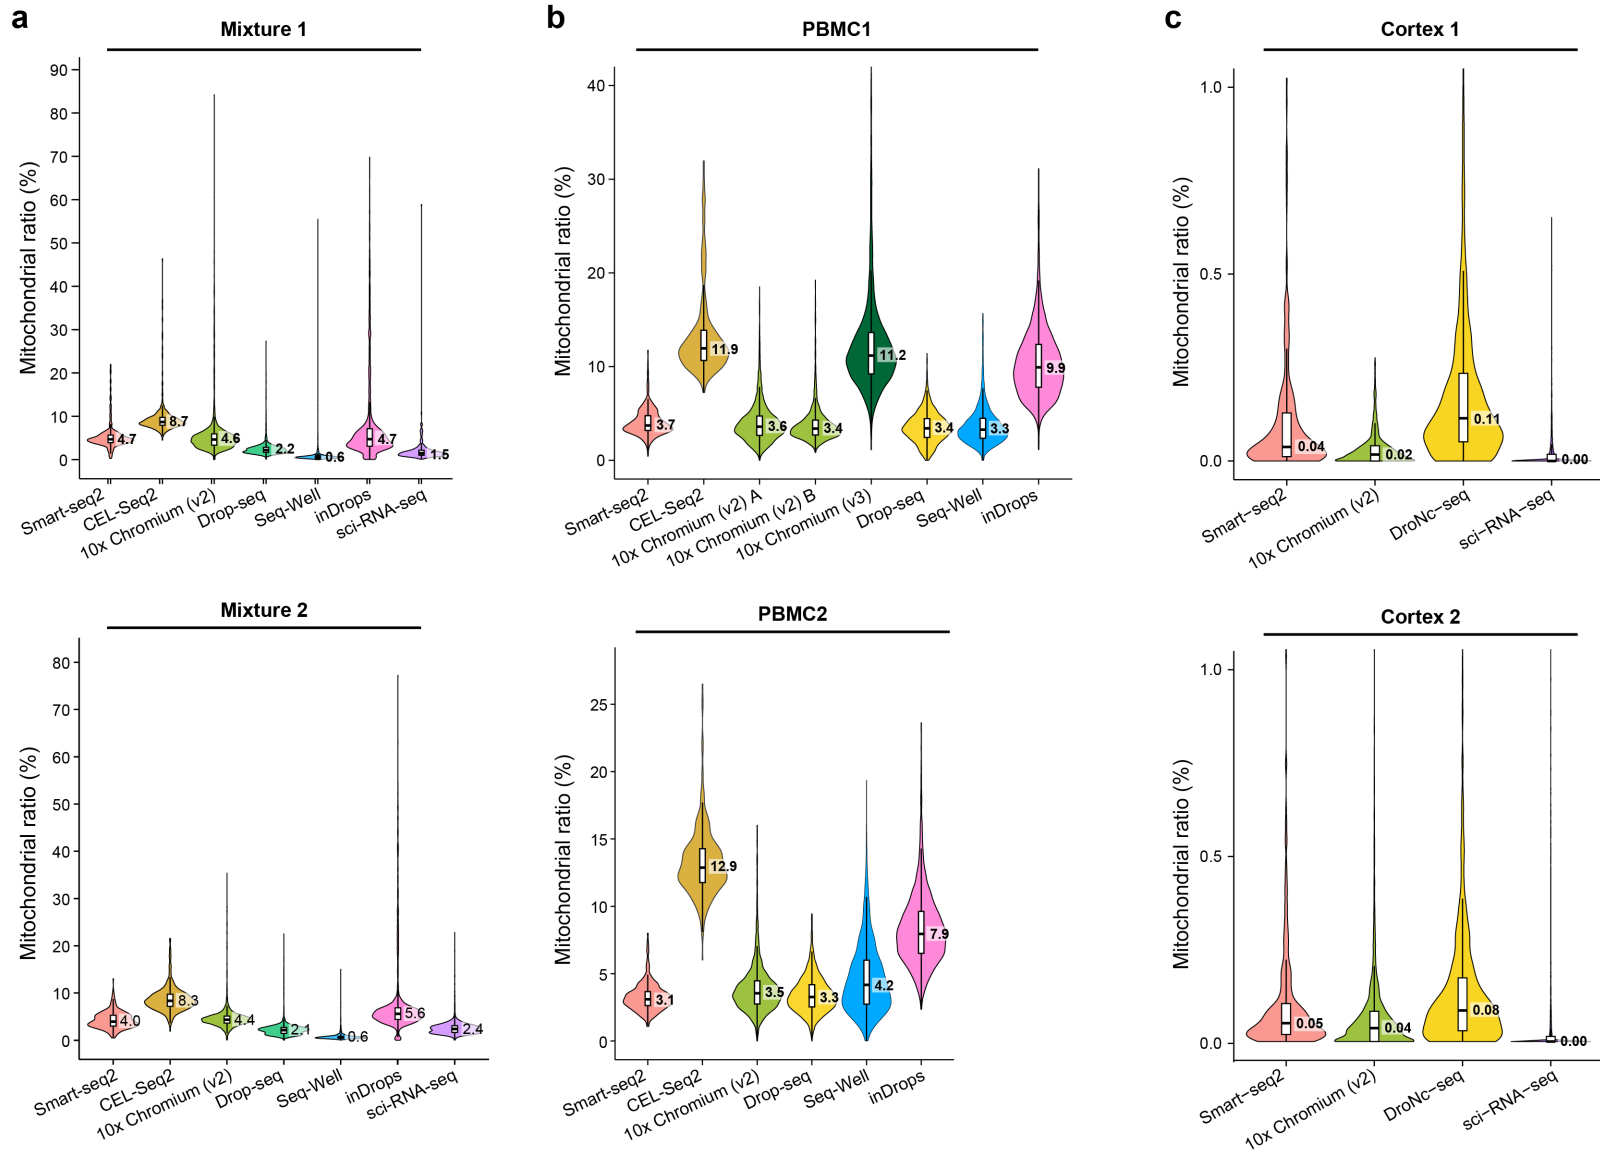



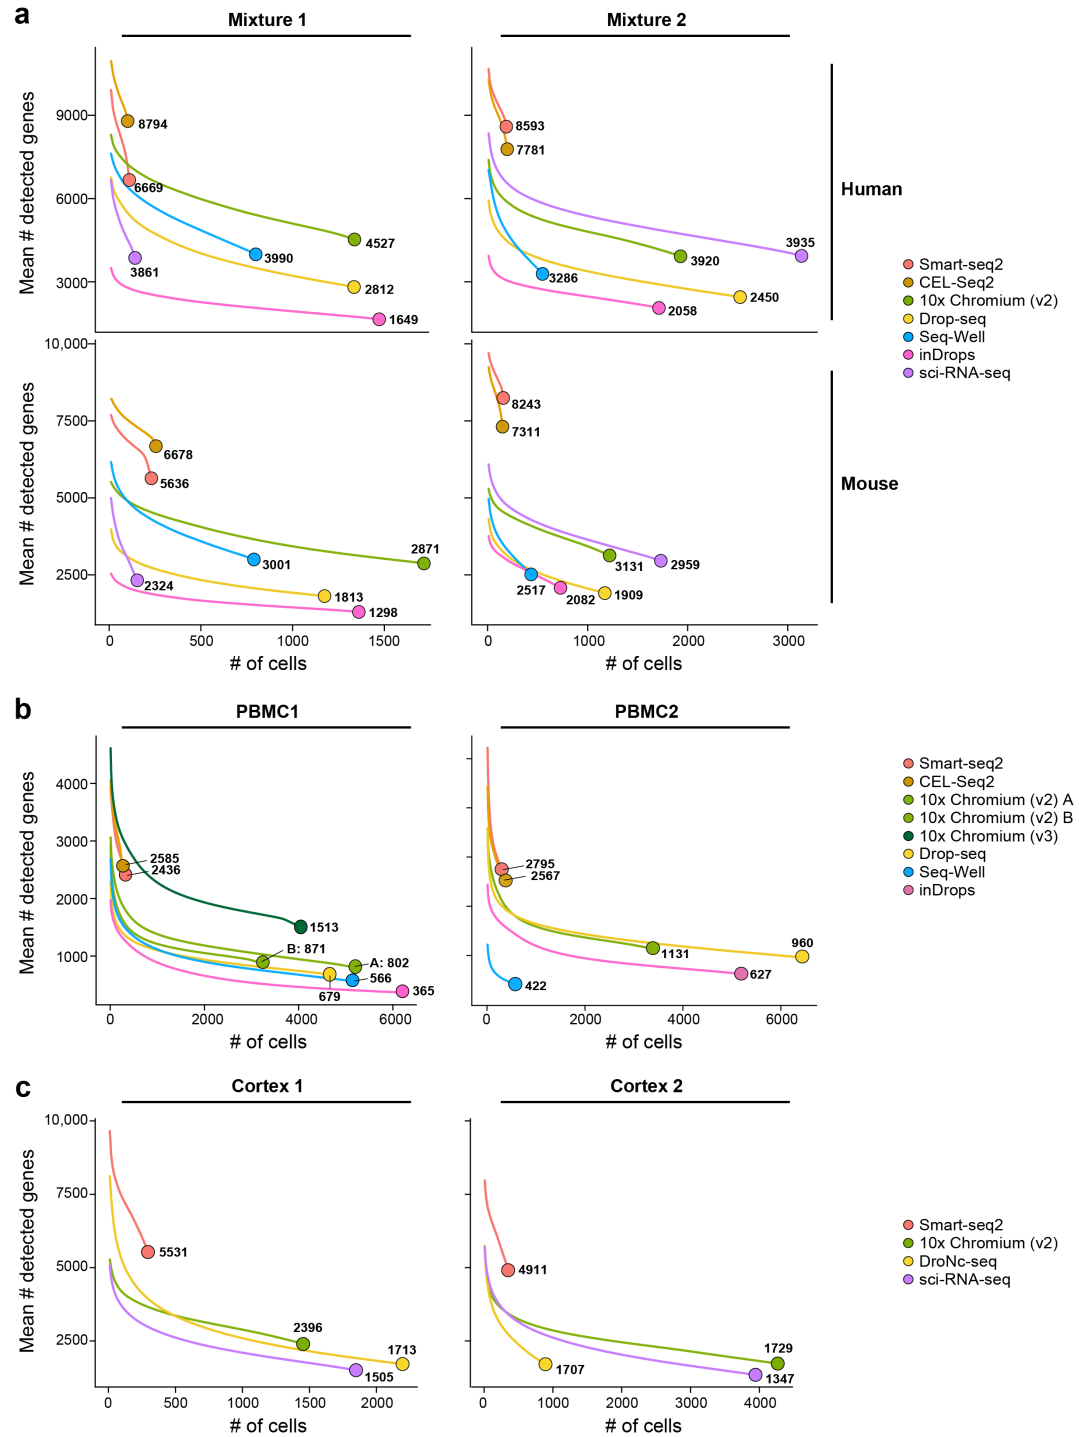

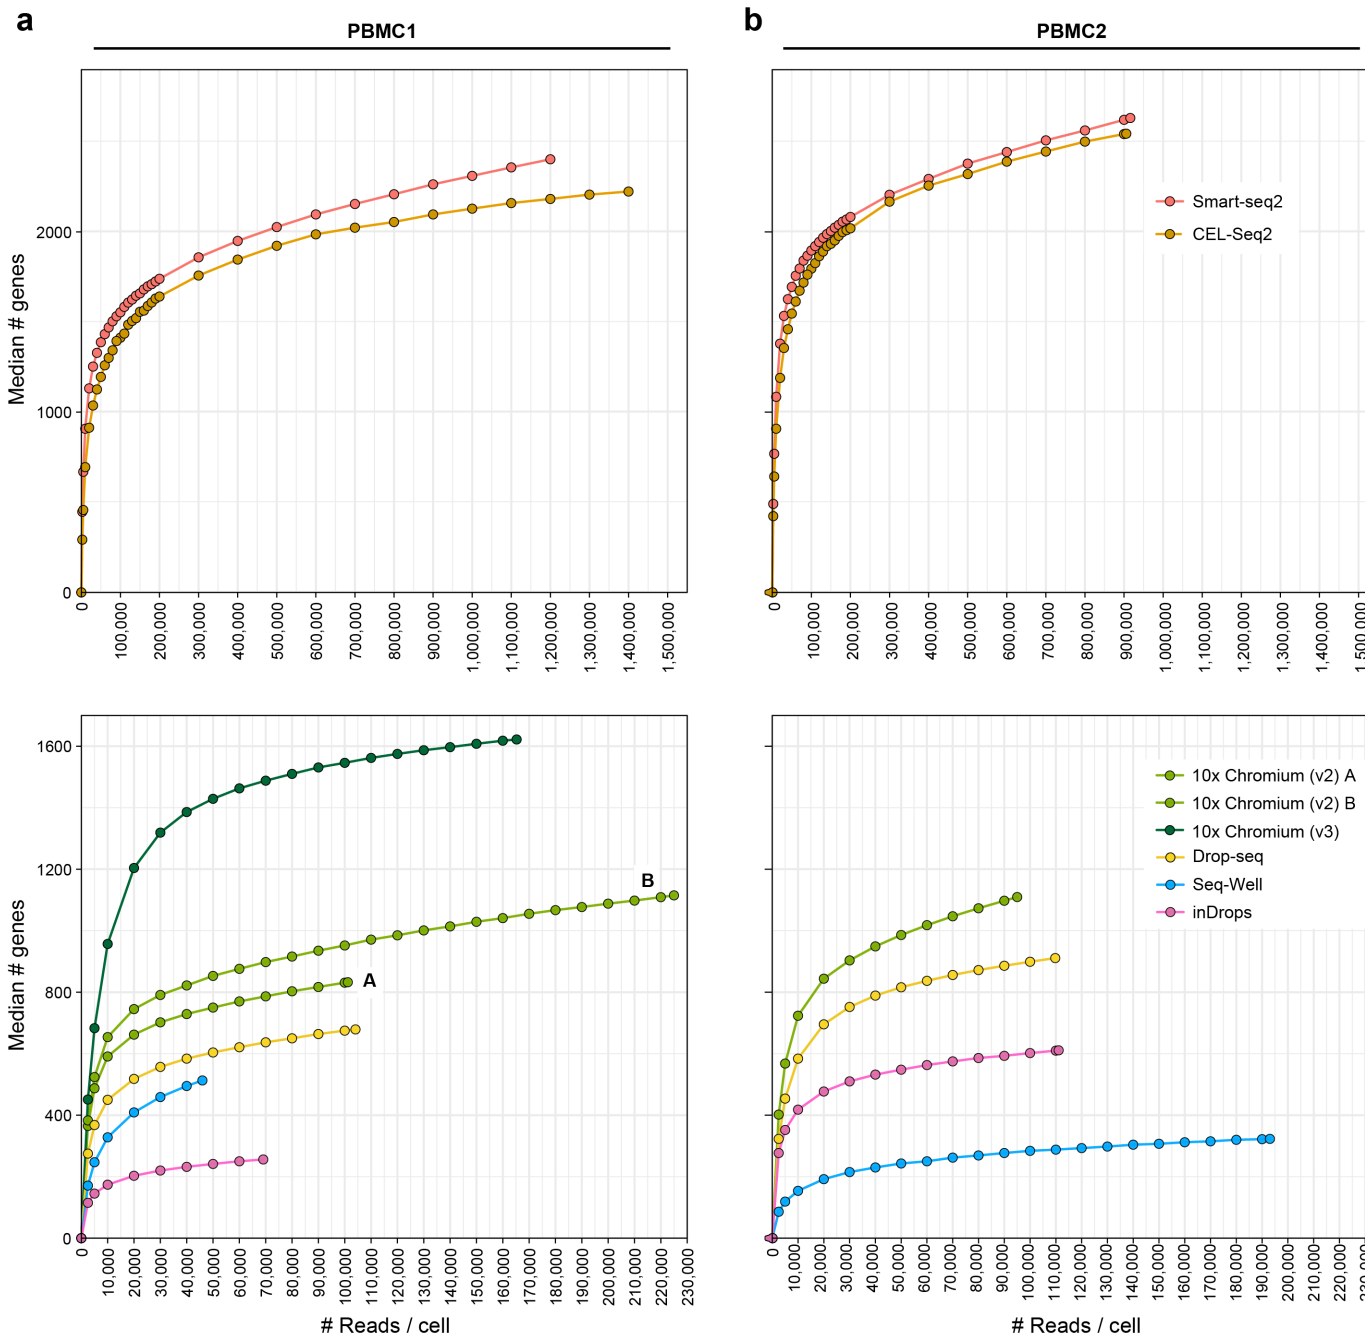

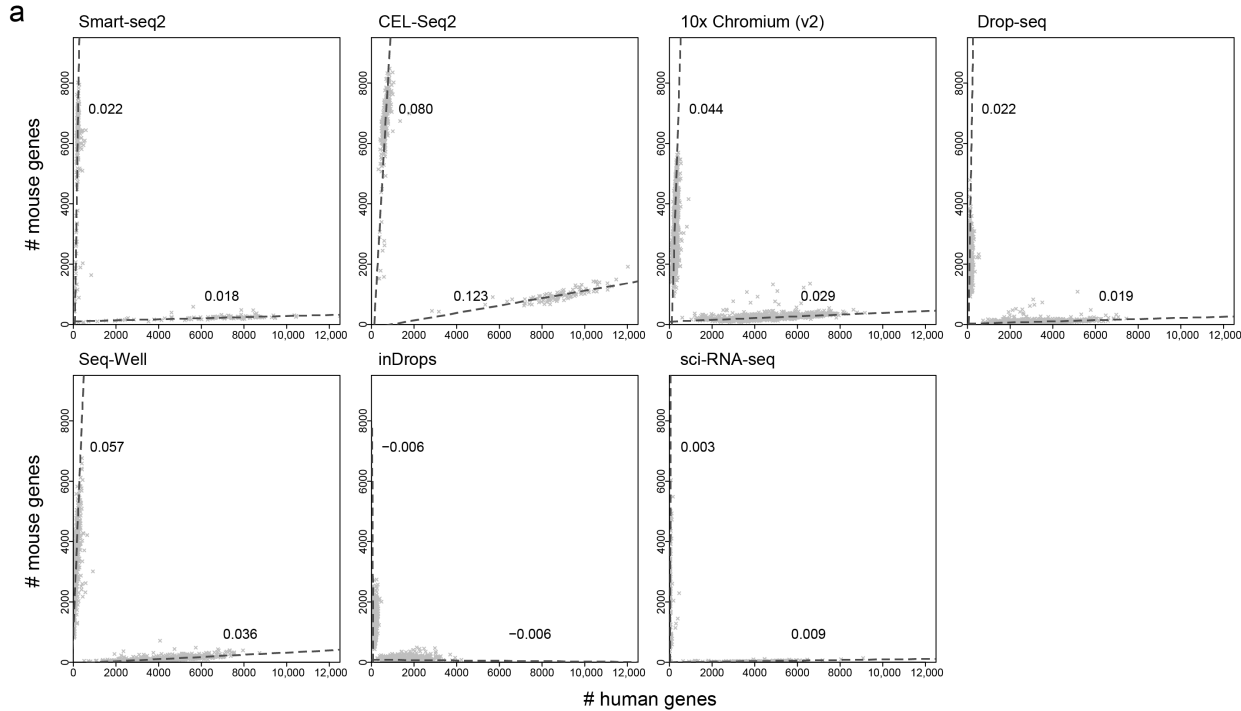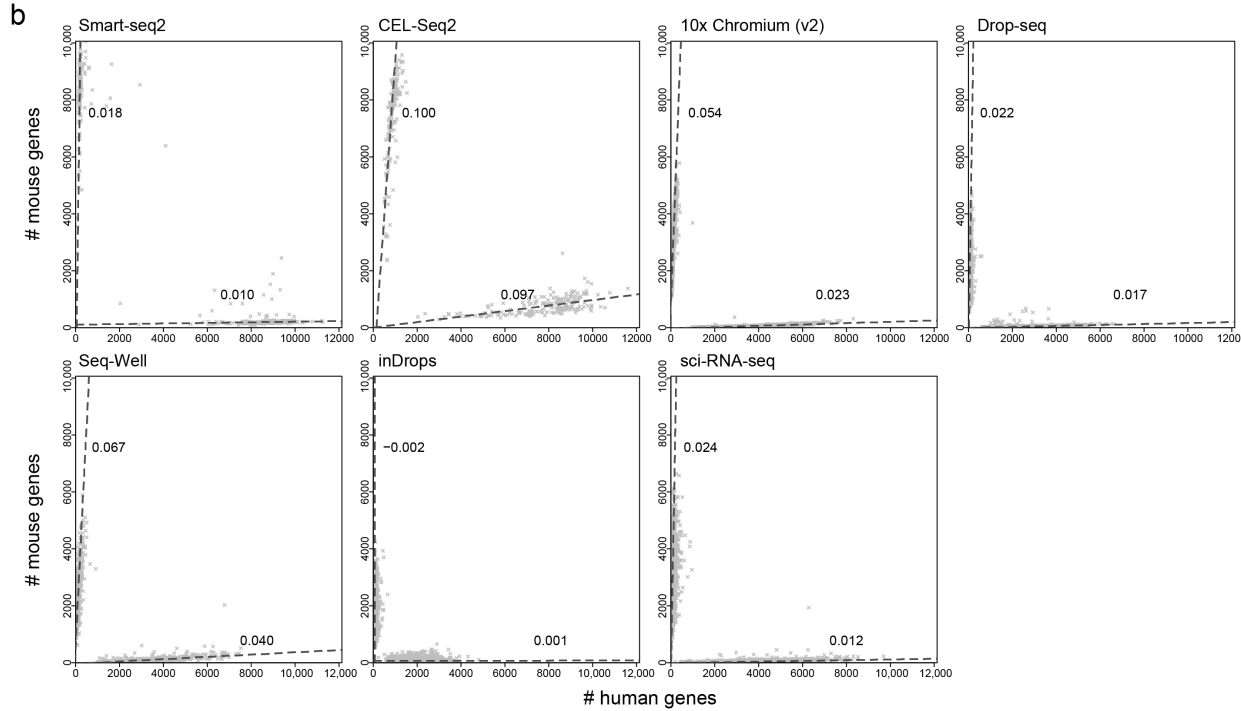

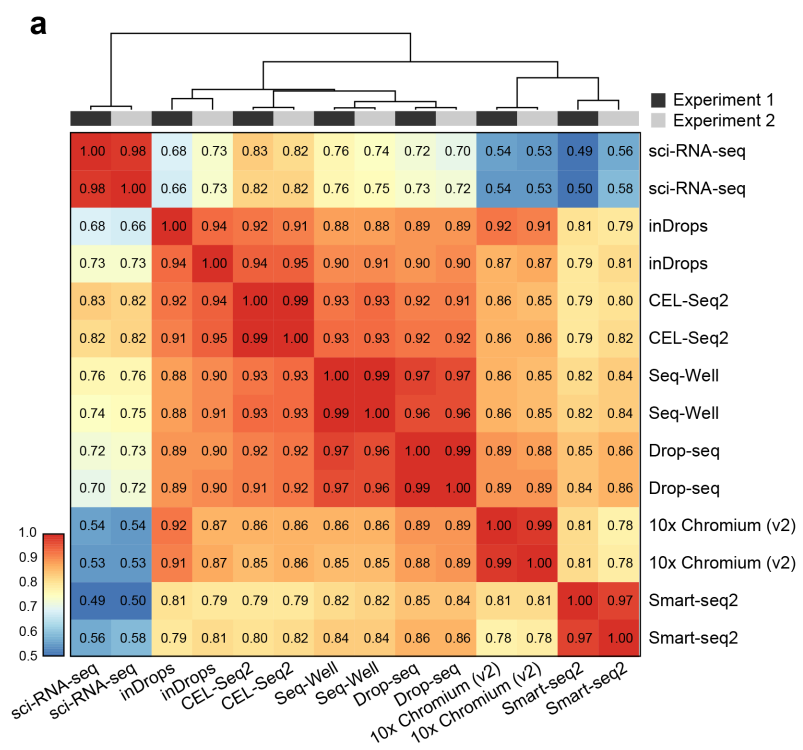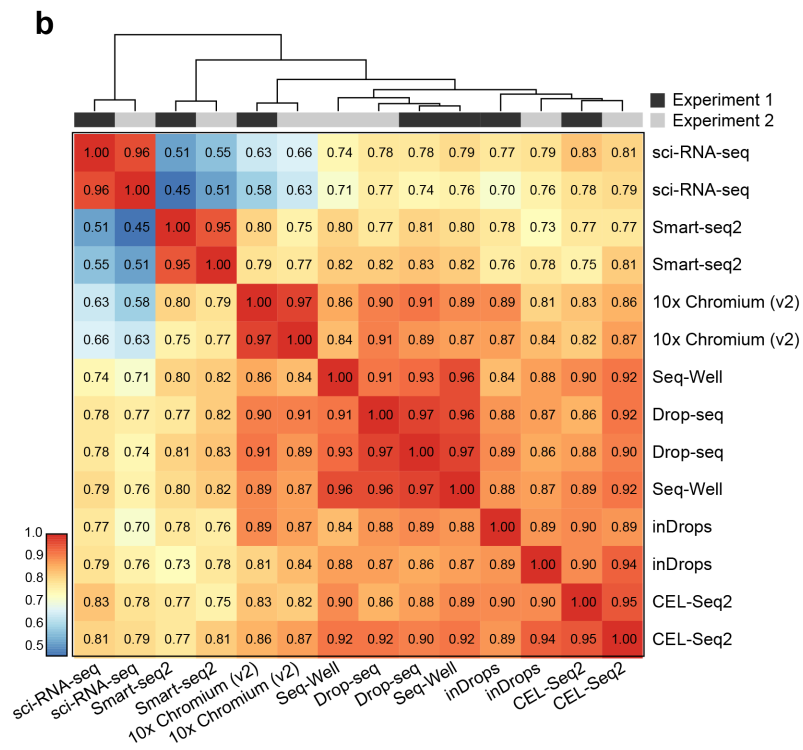

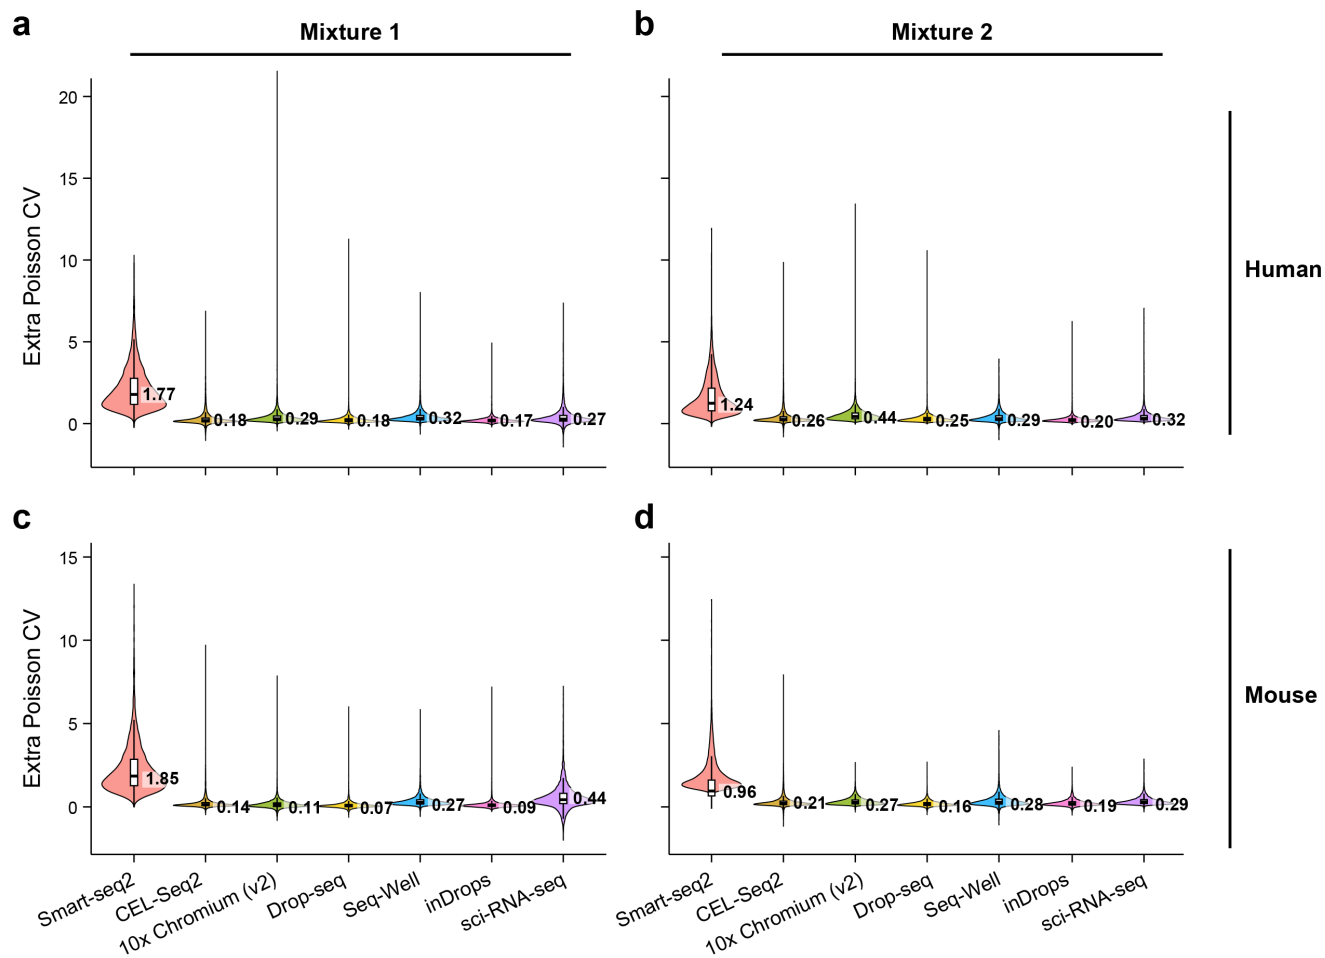

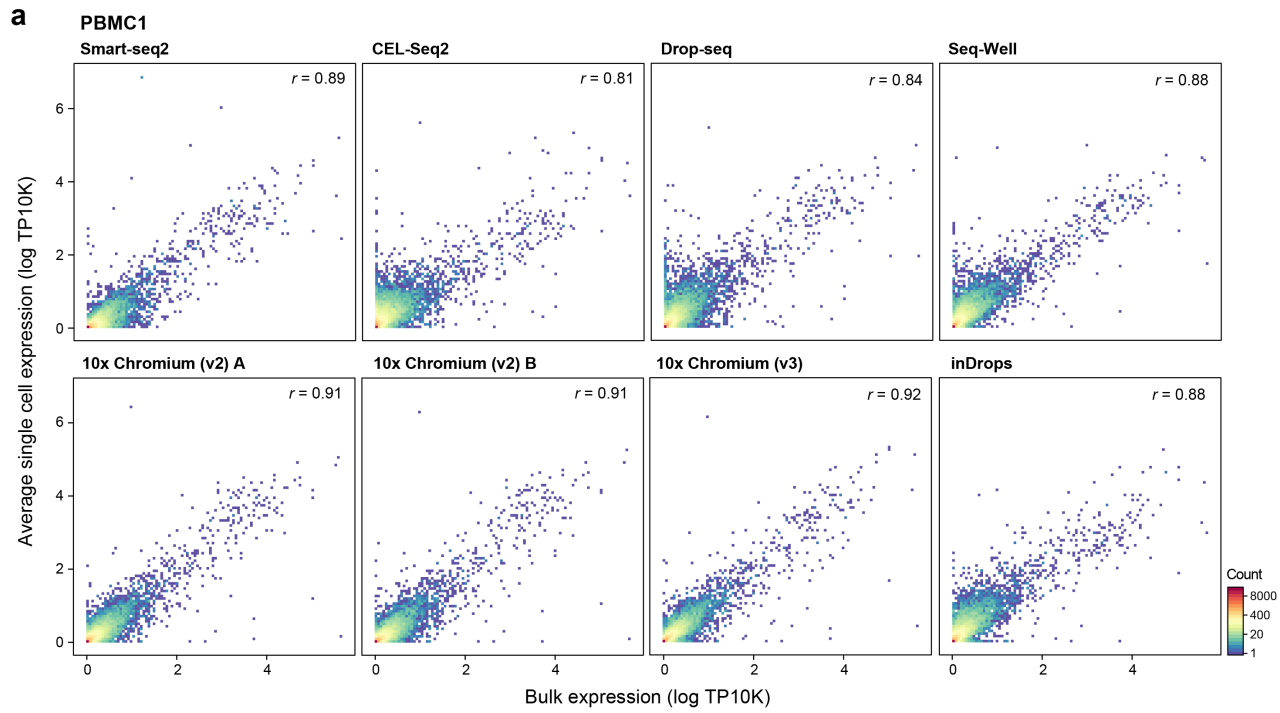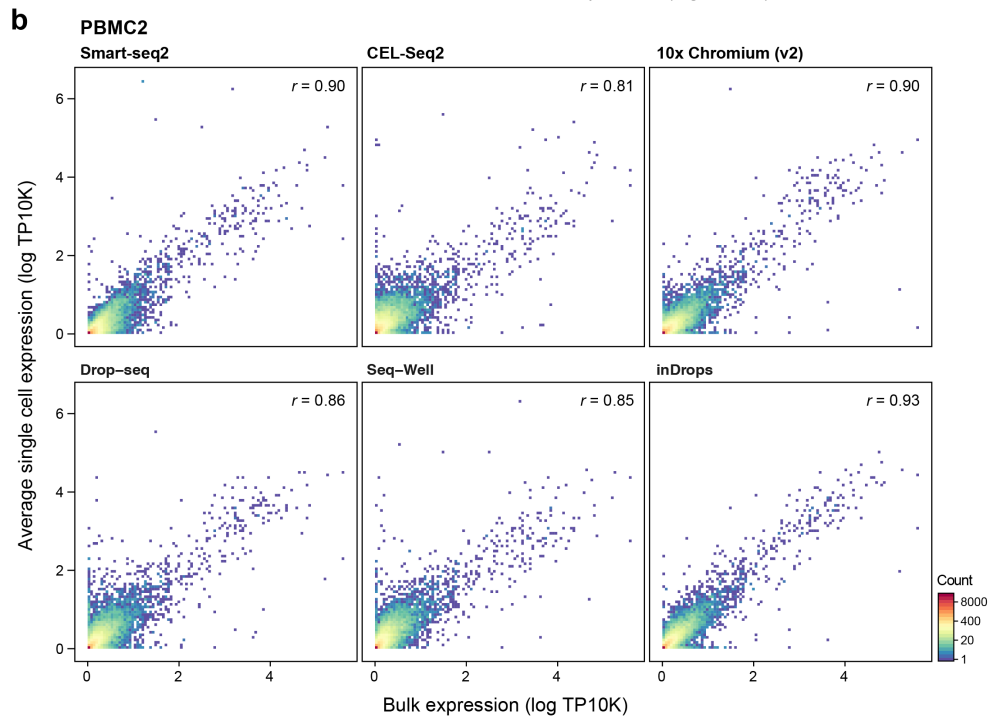

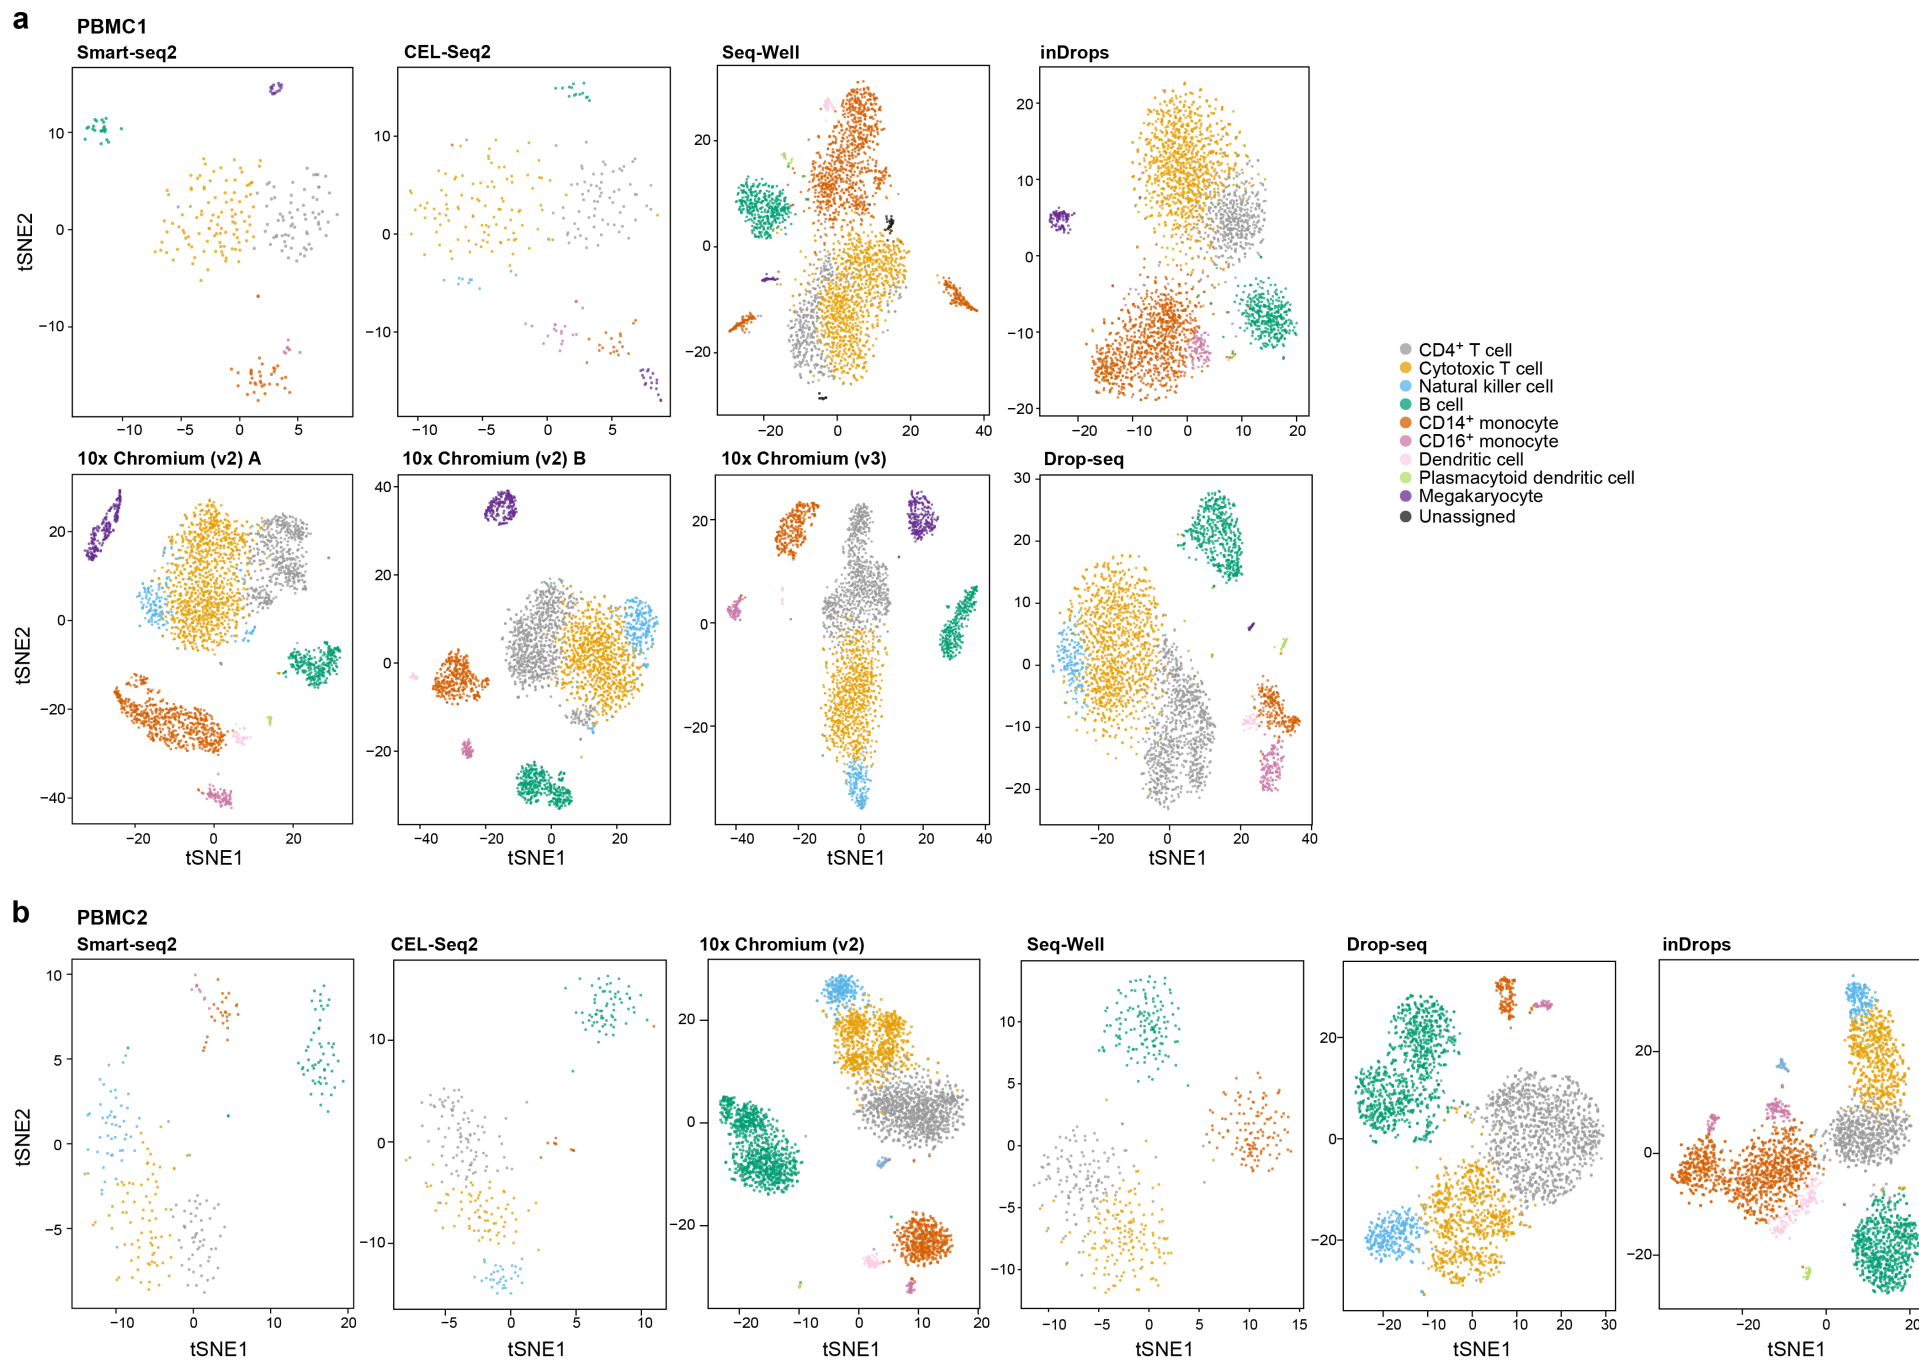

Supp. Fig. 12

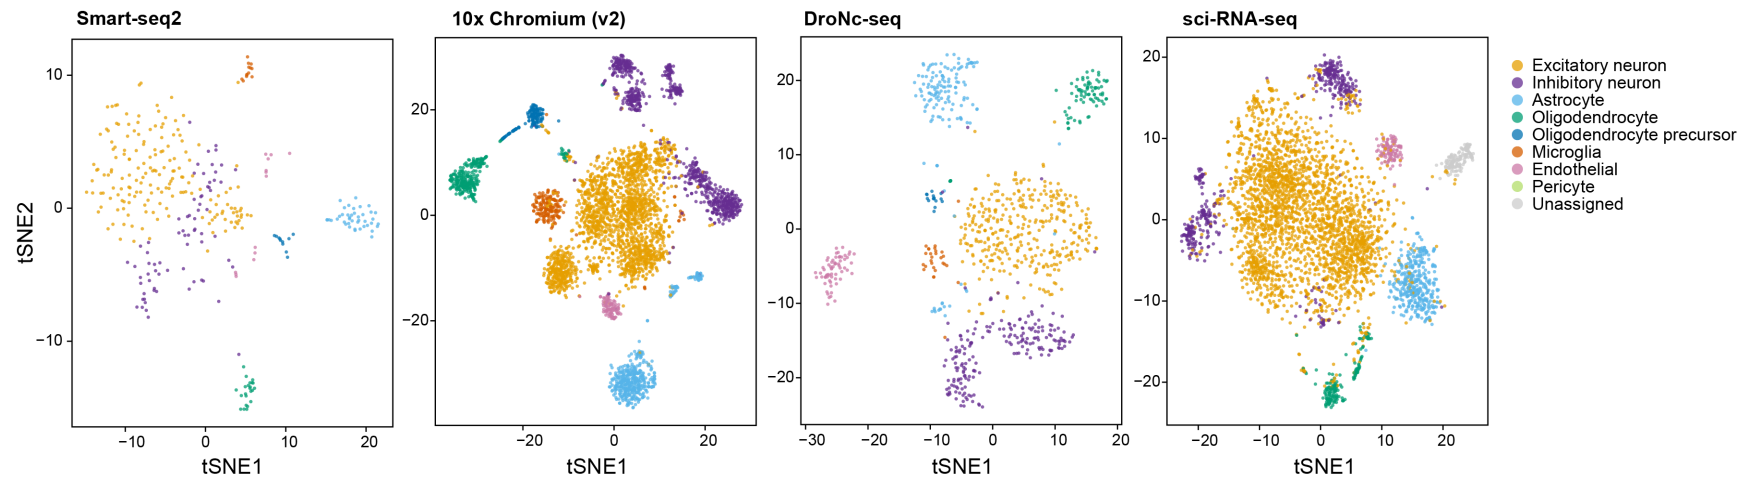



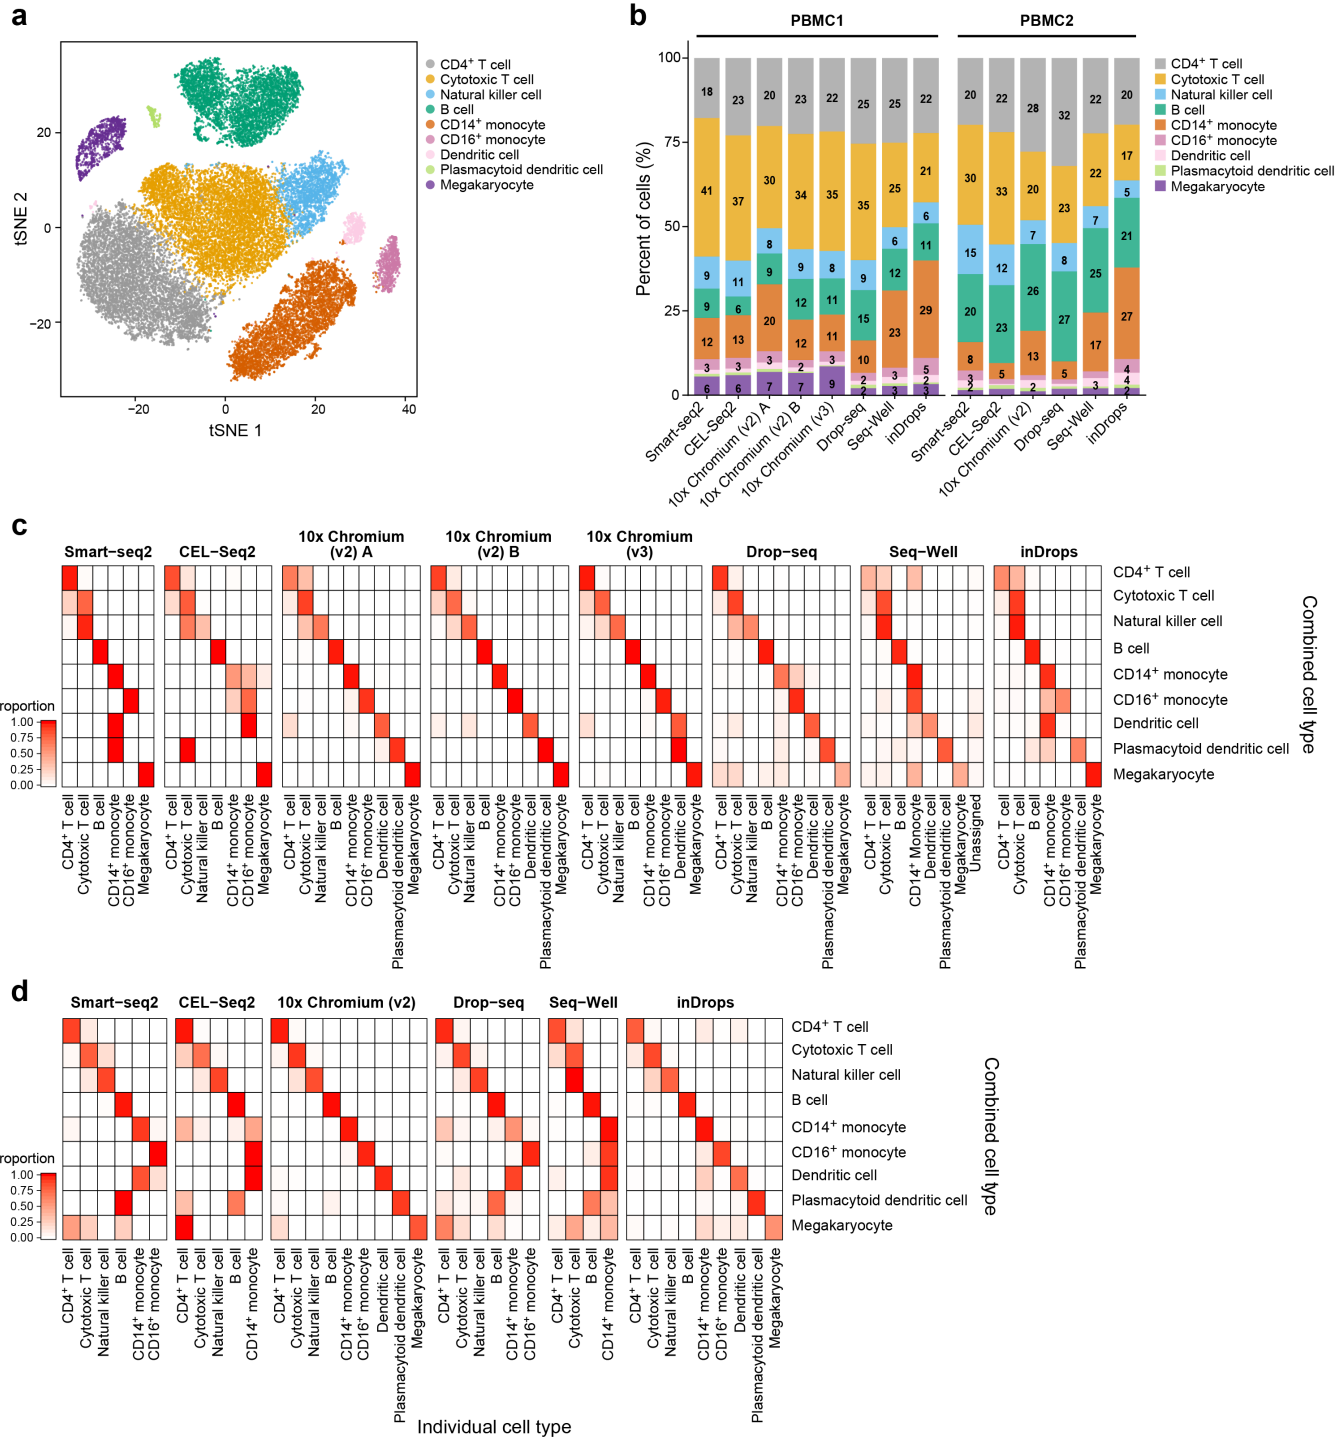

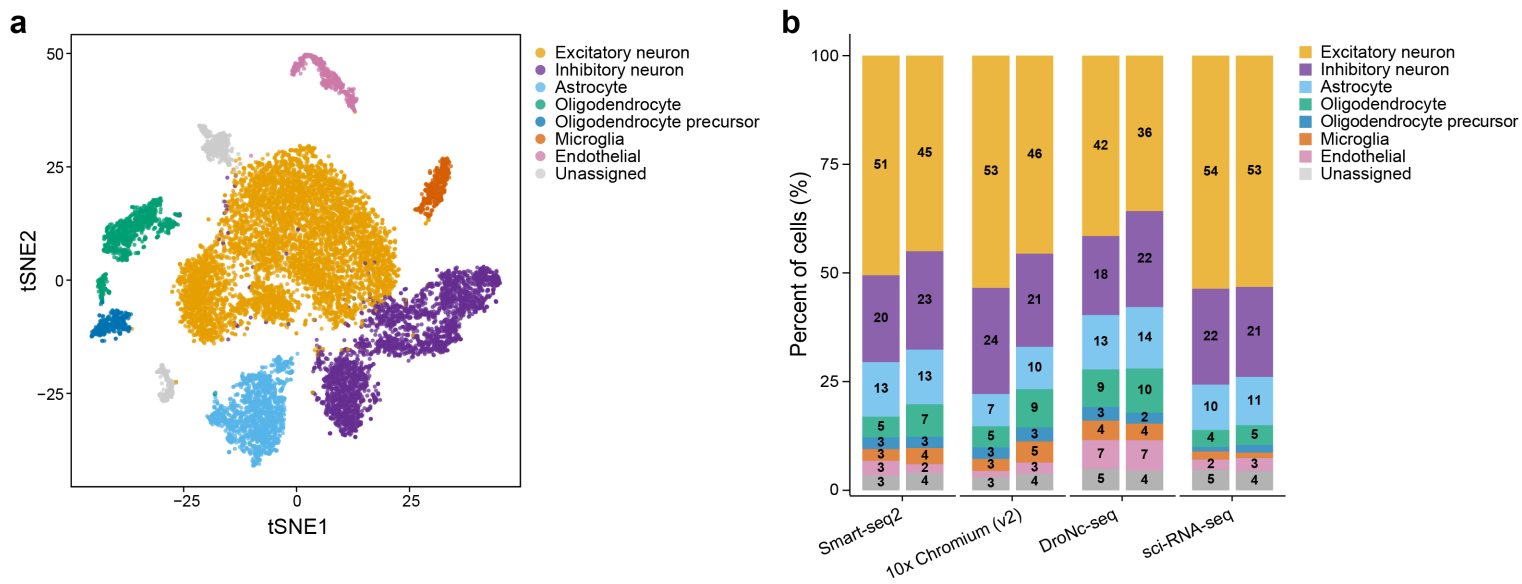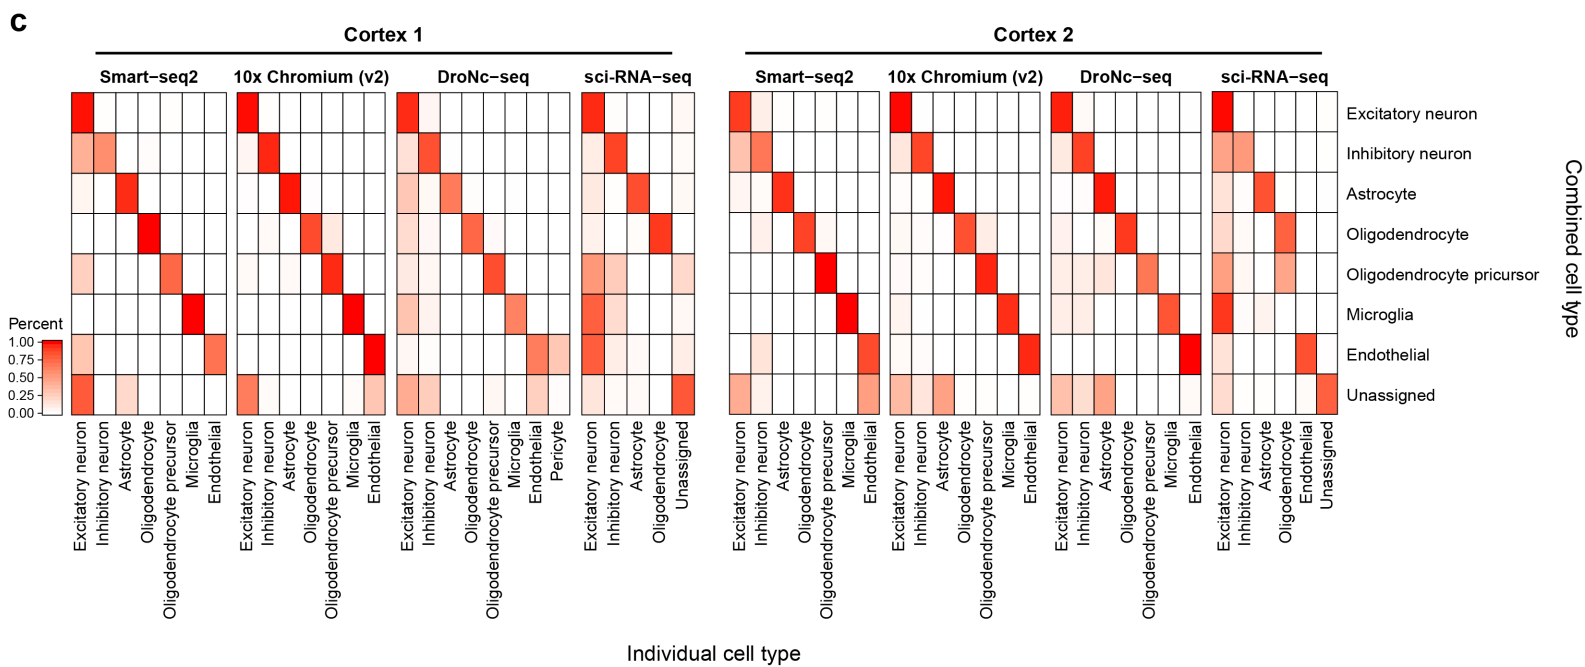

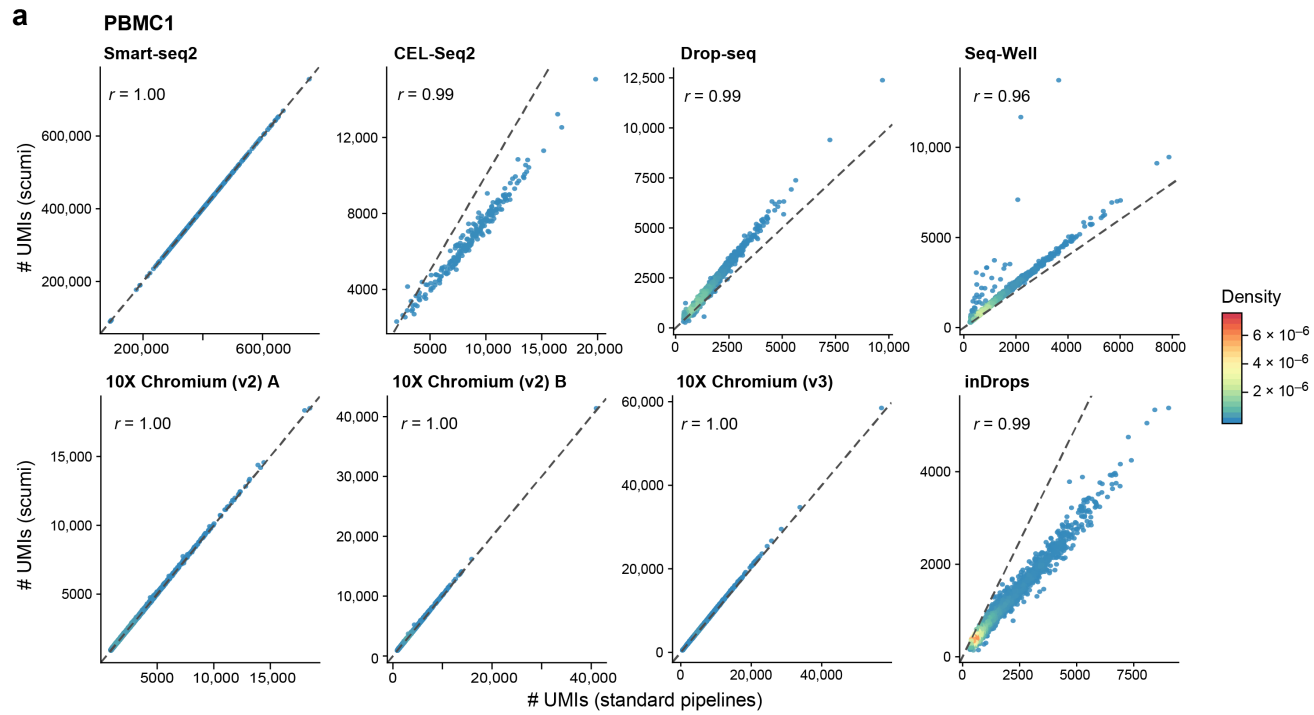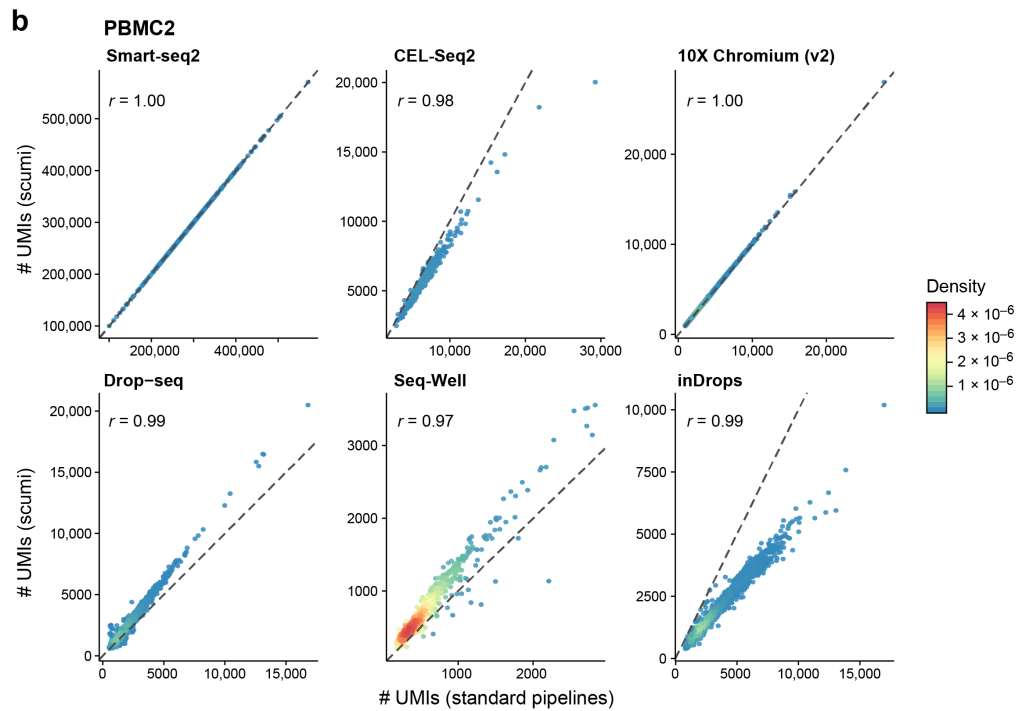

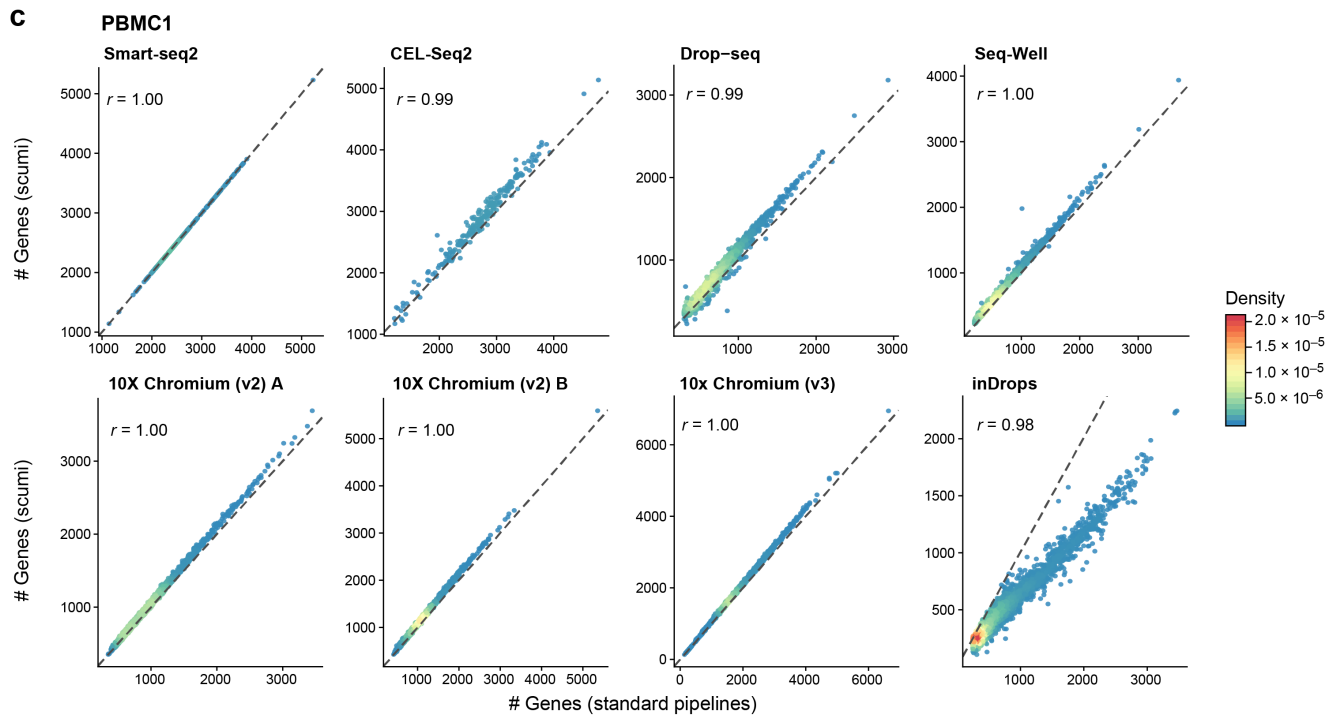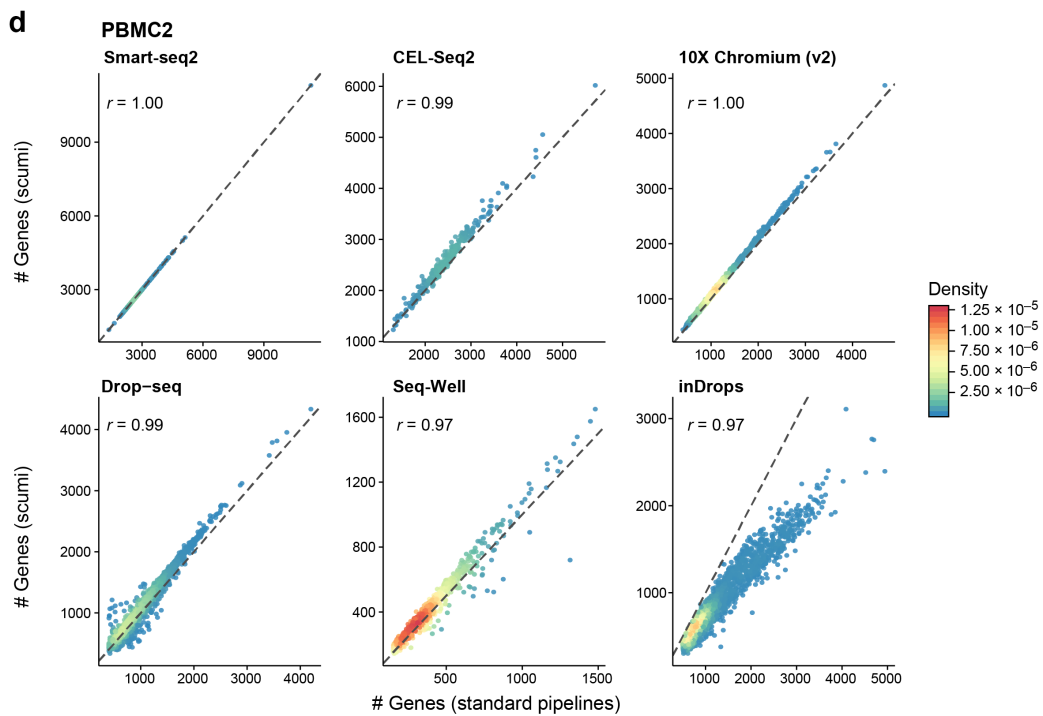

Supplement: Supplementary file [file media-1.pdf]
