# Supplementary material for: Systematic comparative analysis of single cell RNA-sequencing methods
Source: bioRxiv or medRxiv preprint supplement (doi:10.1101/632216), 2019-05-23
Supplement: Supplementary file [file media-2.pdf]

Table s1

| Method                                                                                                                                                                           | Replicate | Total # reads | # reads with poly (T) | % reads without poly (T) | # cells | Total # reads / cell | # human cells | # mouse cells | human / mouse cell ratio | Median # human genes | Median # human UMIs | Median # mouse genes | Median # mouse UMIs | Multiplet ratio |
|----------------------------------------------------------------------------------------------------------------------------------------------------------------------------------|-----------|---------------|-----------------------|--------------------------|---------|----------------------|---------------|---------------|--------------------------|----------------------|---------------------|----------------------|---------------------|-----------------|
| Smart-seq2                                                                                                                                                                       | Mixture 1 | 326,789,097   | NA                    | NA                       | 342     | 955,524              | 110           | 230           | 0.48                     | 7,325                | NA                  | 6,230                | NA                  | 0.6%            |
| CEL-Seq2                                                                                                                                                                         | Mixture 1 | 313,910,931   | 305,042,735           | 2.8%                     | 359     | 874,404              | 101           | 255           | 0.40                     | 8,852                | 52,928              | 6,819                | 34,291              | 0.8%            |
| 10x Chromium (v2)                                                                                                                                                                | Mixture 1 | 385,003,972   | 381,578,888           | 0.9%                     | 3,159   | 121,875              | 1,336         | 1,714         | 0.78                     | 4,886                | 23,445              | 2,973                | 9,510               | 3.5%            |
| Drop-seq                                                                                                                                                                         | Mixture 1 | 294,051,172   | 274,892,045           | 6.5%                     | 2,594   | 113,358              | 1,333         | 1,175         | 1.13                     | 2,701                | 5,503               | 1,749                | 3,075               | 3.3%            |
| Seq-Well                                                                                                                                                                         | Mixture 1 | 241,611,646   | 215,415,794           | 10.8%                    | 1,627   | 148,501              | 797           | 788           | 1.01                     | 4,399                | 12,539              | 3,255                | 8,385               | 2.6%            |
| inDrops                                                                                                                                                                          | Mixture 1 | 275,471,818   | 142,447,608           | 38.1%*                   | 3,081   | 89,410               | 1,472         | 1,361         | 1.08                     | 1,632                | 3,011               | 1,263                | 2,177               | 8.0%            |
| sci-RNA-seq                                                                                                                                                                      | Mixture 1 | 302,408,305   | 284,775,866           | 5.8%                     | 299     | 1,011,399            | 141           | 151           | 0.93                     | 4,555                | 11,490              | 2,932                | 6,677               | 2.3%            |
|                                                                                                                                                                                  |           |               |                       |                          |         |                      |               |               |                          |                      |                     |                      |                     |                 |
| Smart-seq2                                                                                                                                                                       | Mixture 2 | 328,694,640   | NA                    | NA                       | 343     | 958,293              | 187           | 156           | 1.20                     | 8,729                | NA                  | 8,476                | NA                  | 0.0%            |
| CEL-Seq2                                                                                                                                                                         | Mixture 2 | 360,590,379   | 348,088,920           | 3.5%                     | 347     | 1,039,165            | 196           | 149           | 1.32                     | 8,334                | 43,683              | 7,786                | 52,892              | 0.6%            |
| 10x Chromium (v2)                                                                                                                                                                | Mixture 2 | 354,232,761   | 351,169,692           | 0.9%                     | 3,187   | 111,149              | 1,929         | 1,221         | 1.58                     | 4,940                | 23,027              | 3,905                | 13,702              | 1.2%            |
| Drop-seq                                                                                                                                                                         | Mixture 2 | 287,143,635   | 265,627,539           | 7.5%                     | 3,812   | 75,326               | 2,522         | 1,155         | 2.18                     | 2,505                | 5,100               | 1,938                | 3,373               | 3.5%            |
| Seq-Well                                                                                                                                                                         | Mixture 2 | 287,200,476   | 239,060,154           | 16.8%                    | 1,012   | 283,795              | 547           | 433           | 1.26                     | 4,543                | 14,338              | 3,569                | 12,033              | 3.2%            |
| inDrops                                                                                                                                                                          | Mixture 2 | 133,347,729   | 110,816,672           | 12.1%*                   | 2,529   | 52,727               | 1,713         | 729           | 2.35                     | 2,096                | 3,870               | 2,092                | 4,258               | 3.4%            |
| sci-RNA-seq                                                                                                                                                                      | Mixture 2 | 459,027,161   | 448,663,261           | 2.3%                     | 5,023   | 91,385               | 3,135         | 1,733         | 1.81                     | 4,593                | 11,025              | 3,401                | 8,256               | 3.1%            |
|                                                                                                                                                                                  |           |               |                       |                          |         |                      |               |               |                          |                      |                     |                      |                     |                 |
| *For inDrops, 230,135,105 & 126,031,619 reads matched the known sample barcodes in Mixture1 & 2, respectively. Only these reads were used to calculate % reads without poly (T). |           |               |                       |                          |         |                      |               |               |                          |                      |                     |                      |                     |                 |
| All results with scumi computational pipeline.                                                                                                                                   |           |               |                       |                          |         |                      |               |               |                          |                      |                     |                      |                     |                 |

Table s2

| Method                                                                                                                  | Replicate | Total # reads | # reads with poly (T) | % reads without poly (T) | # cells | Total # reads/cell | Median # UMIs | Median # genes | # cells* | Median # UMIs* | Median # genes* | Threshold (genes/cell)* |
|-------------------------------------------------------------------------------------------------------------------------|-----------|---------------|-----------------------|--------------------------|---------|--------------------|---------------|----------------|----------|----------------|-----------------|-------------------------|
| Smart-seq2                                                                                                              | PBMC 1    | 375,056,049   | NA                    | NA                       | 311     | 1,205,968          | NA            | 2,406          | 311      | NA             | 2,406           | 1,000                   |
| CEL-Seq2                                                                                                                | PBMC 1    | 384,742,228   | 370,155,021           | 3.8%                     | 257     | 1,497,051          | 6,383         | 2,798          | 250      | 8,470          | 2,696           | 1,200                   |
| 10x Chromium (v2) A                                                                                                     | PBMC 1    | 523,224,661   | 519,300,975           | 0.7%                     | 5,172   | 101,165            | 2,029         | 833            | 4,368    | 2,309          | 864             | none                    |
| 10x Chromium (v2) B                                                                                                     | PBMC 1    | 687,784,556   | 679,229,257           | 1.2%                     | 3,057   | 224,987            | 3,050         | 1,115          | 3,035    | 2,978          | 1,042           | none                    |
| 10x Chromium (v3)                                                                                                       | PBMC 1    | 666,523,933   | 660,891,029           | 0.8%                     | 4,033   | 165,268            | 4,926         | 1,622          | 3,795    | 4,851          | 1,555           | none                    |
| Drop-seq                                                                                                                | PBMC 1    | 487,402,716   | 414,658,200           | 14.9%                    | 4,683   | 104,079            | 1,199         | 679            | 4,864    | 938            | 580             | 300                     |
| Seq-Well                                                                                                                | PBMC 1    | 235,605,948   | NA                    | NA                       | 5,125   | 45,972             | 844           | 513            | 5,006    | 696            | 471             | 200                     |
| inDrops                                                                                                                 | PBMC 1    | 427,146,724   | 325,157,955           | 23.9%                    | 6,184   | 69,073             | 366           | 256            | 5,946    | 599            | 373             | 250                     |
|                                                                                                                         |           |               |                       |                          |         |                    |               |                |          |                |                 |                         |
| Smart-seq2                                                                                                              | PMBC 2    | 250,081,663   | NA                    | NA                       | 273     | 916,050            | NA            | 2,632          | 303      | NA             | 2,589           | 1,000                   |
| CEL-Seq2                                                                                                                | PMBC 2    | 278,052,915   | 271,465,989           | 2.4%                     | 307     | 905,710            | 5,787         | 2,545          | 299      | 6,685          | 2,447           | 1,200                   |
| 10x Chromium (v2)                                                                                                       | PMBC 2    | 319,398,613   | 312,697,214           | 2.1%                     | 3,362   | 95,003             | 2,627         | 1,110          | 3,188    | 2,627          | 1,060           | none                    |
| Drop-seq                                                                                                                | PMBC 2    | 703,840,624   | 623,619,962           | 11.4%                    | 6,412   | 109,769            | 1,851         | 911            | 6,323    | 1,483          | 818             | 400                     |
| Seq-Well                                                                                                                | PMBC 2    | 176,233,532   | 103,664,673           | 41.2%                    | 913     | 193,027            | 519           | 323            | 1,087    | 363            | 280             | 150                     |
| inDrops                                                                                                                 | PMBC 2    | 502,795,162   | 430,102,035           | 14.5%                    | 4,526   | 111,090            | 1,243         | 611            | 4,708    | 2,021          | 782             | 500                     |
|                                                                                                                         |           |               |                       |                          |         |                    |               |                |          |                |                 |                         |
| All results are from scumi computational pipeline, except those with an * are from standard, method-specific pipelines. |           |               |                       |                          |         |                    |               |                |          |                |                 |                         |
| For standard pipelines, only cells above the threshold were included.                                                   |           |               |                       |                          |         |                    |               |                |          |                |                 |                         |
| NA = Not applicable                                                                                                     |           |               |                       |                          |         |                    |               |                |          |                |                 |                         |

Table s3

| Method                                         | Replicate | Total # reads | # reads with poly (T) | % reads without poly (T) | # cells | Total # reads / cell | Median # UMIs | Median # genes |
|------------------------------------------------|-----------|---------------|-----------------------|--------------------------|---------|----------------------|---------------|----------------|
| Smart-seq2                                     | Cortex 1  | 478,693,321   | NA                    | NA                       | 295     | 1,622,689            | NA            | 5,774          |
| 10x Chromium (v2)                              | Cortex 1  | 561,087,440   | 536,520,270           | 4.4%                     | 1,480   | 379,113              | 6,994         | 3,221          |
| DroNc-seq                                      | Cortex 1  | 216,550,548   | 185,384,312           | 14.4%                    | 2,195   | 98,656               | 2,092         | 1,401          |
| sci-RNA-seq                                    | Cortex 1  | 315,124,882   | 300,100,752           | 4.8%                     | 1,886   | 167,086              | 3,524         | 1,591          |
|                                                |           |               |                       |                          |         |                      |               |                |
| Smart-seq2                                     | Cortex 2  | 570,270,279   | NA                    | NA                       | 349     | 1,634,012            | NA            | 5,014          |
| 10x Chromium (v2)                              | Cortex 2  | 590,837,576   | 567,439,605           | 4.0%                     | 4,091   | 144,424              | 3,527         | 1,931          |
| DroNc-seq                                      | Cortex 2  | 250,573,006   | 194,428,927           | 22.4%                    | 935     | 267,993              | 3,094         | 1,879          |
| sci-RNA-seq                                    | Cortex 2  | 382,131,662   | 367,386,555           | 3.9%                     | 3,944   | 96,889               | 1,895         | 1,163          |
|                                                |           |               |                       |                          |         |                      |               |                |
| All results with scumi computational pipeline. |           |               |                       |                          |         |                      |               |                |

Table s4

| Method              | Experiment | Additional reads | Number Cells | Additional reads per cell | Average reads per cell | Increase in reads per cell |
|---------------------|------------|------------------|--------------|---------------------------|------------------------|----------------------------|
| Smart-seq2          | PBMC1      | 7,291,199        | 311          | 23,444                    | 1,205,968              | 1.94%                      |
| Smart-seq2          | PBMC2      | 4,508,783        | 273          | 16,516                    | 916,050                | 1.80%                      |
| CEL-Seq2            | PBMC1      | 1,828,337        | 257          | 7,114                     | 1,197,690              | 0.59%                      |
| CEL-Seq2            | PBMC2      | 1,113,041        | 307          | 3,626                     | 905,710                | 0.40%                      |
| 10X Chromium (v2) A | PBMC1      | 2,810,044        | 5,184        | 542                       | 68,635                 | 0.79%                      |
| 10X Chromium (v2) B | PBMC1      | 1,714,342        | 3,222        | 532                       | 66,173                 | 0.80%                      |
| 10X Chromium (v3)   | PBMC1      | 2,577,057        | 4,027        | 640                       | 69,516                 | 0.92%                      |
| 10X Chromium (v2)   | PBMC2      | 2,138,732        | 3,362        | 636                       | 95,003                 | 0.67%                      |
| Drop-seq            | PBMC1      | 2,846,555        | 4,640        | 613                       | 69,331                 | 0.88%                      |
| Drop-seq            | PBMC2      | 5,754,844        | 6,412        | 898                       | 95,501                 | 0.94%                      |
| Seq-Well            | PBMC1      | 2,948,993        | 5,125        | 575                       | 45,972                 | 1.25%                      |
| Seq-Well            | PBMC2      | 415,842          | 551          | 755                       | 156,699                | 0.48%                      |
| inDrops             | PBMC1      | 4,559,763        | 6,184        | 737                       | 69,073                 | 1.07%                      |
| inDrops             | PBMC2      | 4,086,940        | 5,166        | 791                       | 83,705                 | 0.95%                      |

Table s5

| Experiment         | Method              | # Cells<br>(after sampling) | # Cells<br>(before sampling) | Average reads per<br>cell (Using # cells<br>after sampling) | Average reads per<br>cell (Using # cells<br>before sampling) | Total Reads<br>(after sampling) | Notes (read sampling)      | # cells (after<br>sampling cells) |
|--------------------|---------------------|-----------------------------|------------------------------|-------------------------------------------------------------|--------------------------------------------------------------|---------------------------------|----------------------------|-----------------------------------|
| Mixture1           | Smart-seq2          | 342                         | 342                          | 879,194                                                     | 879,194                                                      | 300,684,518                     |                            | NA                                |
| Mixture1           | CEL-Seq2            | 359                         | 359                          | 874,404                                                     | 874,404                                                      | 313,910,931                     | Sampled other to this one  | NA                                |
| Mixture1           | 10X Chromium        | 3,162                       | 3,159                        | 88,883                                                      | 88,968                                                       | 281,049,304                     |                            | NA                                |
| Mixture1           | Drop-seq            | 2,594                       | 2,594                        | 89,551                                                      | 89,551                                                       | 232,296,106                     |                            | NA                                |
| Mixture1           | Seq-Well            | 1,630                       | 1,627                        | 88,936                                                      | 89,100                                                       | 144,965,823                     |                            | NA                                |
| Mixture1           | inDrops             | 3,081                       | 3,081                        | 89,410                                                      | 89,410                                                       | 275,471,818                     | Sampled others to this one | NA                                |
| Mixture1           | sci-RNA-seq         | 300                         | 299                          | 90,703                                                      | 91,006                                                       | 27,210,842                      |                            | NA                                |
| Mixture2           | Smart-seq2          | 343                         | 343                          | 958,293                                                     | 958,293                                                      | 328,694,640                     | Sampled other to this one  | NA                                |
| Mixture2           | CEL-Seq2            | 347                         | 347                          | 956,044                                                     | 956,044                                                      | 331,747,198                     |                            | NA                                |
| Mixture2           | 10X Chromium        | 3,186                       | 3,187                        | 52,254                                                      | 52,238                                                       | 166,480,959                     |                            | NA                                |
| Mixture2           | Drop-seq            | 3,830                       | 3,812                        | 52,480                                                      | 52,728                                                       | 201,000,212                     |                            | NA                                |
| Mixture2           | Seq-Well            | 1,015                       | 1,012                        | 53,756                                                      | 53,916                                                       | 54,562,643                      |                            | NA                                |
| Mixture2           | inDrops             | 2,529                       | 2,529                        | 52,727                                                      | 52,727                                                       | 133,347,729                     | Sampled others to this one | NA                                |
| Mixture2           | sci-RNA-seq         | 5,026                       | 5,023                        | 52,982                                                      | 53,013                                                       | 266,286,458                     |                            | NA                                |
| PBMC1              | Smart-seq2          | 311                         | 311                          | 1,205,968                                                   | 1,205,968                                                    | 375,056,048                     | Sampled other to this one  | 253                               |
| PBMC1              | CEL-Seq2            | 253                         | 257                          | 1,216,626                                                   | 1,197,690                                                    | 307,806,288                     |                            | 253                               |
| PBMC1              | 10X Chromium (v2) A | 5,184                       | 5,172                        | 68,635                                                      | 68,794                                                       | 355,803,563                     |                            | 3,222                             |
| PBMC1              | 10X Chromium (v2) B | 3,222                       | 3,057                        | 66,173                                                      | 69,744                                                       | 213,207,949                     |                            | 3,222                             |
| PBMC1              | 10X Chromium (v3)   | 4,027                       | 4,033                        | 69,516                                                      | 69,413                                                       | 279,941,482                     |                            | 3,222                             |
| PBMC1              | Drop-seq            | 4,640                       | 4,683                        | 69,331                                                      | 68,694                                                       | 321,693,781                     |                            | 3,222                             |
| PBMC1              | Seq-Well            | 5,125                       | 5,125                        | 45,972                                                      | 45,972                                                       | 235,605,948                     | Used all reads             | 3,222                             |
| PBMC1              | inDrops             | 6,184                       | 6,184                        | 69,073                                                      | 69,073                                                       | 427,147,432                     | Sampled others to this one | 3,222                             |
| PBMC2              | Smart-seq2          | 273                         | 273                          | 916,050                                                     | 916,050                                                      | 250,081,650                     | Used all reads             | 273                               |
| PBMC2              | CEL-Seq2            | 307                         | 307                          | 905,710                                                     | 905,710                                                      | 278,052,970                     | Used all reads             | 273                               |
| PBMC2              | 10X Chromium        | 3,362                       | 3,362                        | 95,003                                                      | 95,003                                                       | 319,400,086                     | Sampled others to this one | 3,362                             |
| PBMC2              | Drop-seq            | 6,412                       | 6,412                        | 95,501                                                      | 95,501                                                       | 612,349,900                     |                            | 3,362                             |
| PBMC2              | Seq-Well            | 551                         | 913                          | 156,699                                                     | 94,569                                                       | 86,341,083                      |                            | 551                               |
| PBMC2              | inDrops             | 5,166                       | 4,526                        | 83,705                                                      | 95,541                                                       | 432,418,556                     |                            | 3,362                             |
| Cortex1            | Smart-seq2          | 295                         | 295                          | 1,622,689                                                   | 1,622,689                                                    | 478,693,321                     | Used all reads             | 295                               |
| Cortex1            | 10X Chromium        | 1,453                       | 1,480                        | 100,404                                                     | 98,572                                                       | 145,886,949                     |                            | 1,453                             |
| Cortex1            | DroNc-seq           | 2,195                       | 2,195                        | 98,656                                                      | 98,656                                                       | 216,550,548                     | Sampled others to this one | 1,453                             |
| Cortex1            | sci-RNA-seq         | 1,848                       | 1,886                        | 100,617                                                     | 98,589                                                       | 185,939,664                     |                            | 1,453                             |
| Cortex2            | Smart-seq2          | 349                         | 349                          | 1,634,012                                                   | 1,634,012                                                    | 570,270,279                     | Used all reads             | 349                               |
| Cortex2            | 10X Chromium        | 4,267                       | 4,091                        | 92,775                                                      | 96,766                                                       | 395,869,815                     |                            | 3,944                             |
| Cortex2            | DroNc-seq           | 892                         | 935                          | 101,130                                                     | 96,479                                                       | 90,208,024                      |                            | 892                               |
| Cortex2            | sci-RNA-seq         | 3,944                       | 3,944                        | 96,889                                                      | 96,889                                                       | 382,131,662                     | Sampled others to this one | 3,944                             |
| NA: not applicable |                     |                             |                              |                                                             |                                                              |                                 |                            |                                   |

Table s6

| Expt. | Method     | Cell Type (Harmony)         | Cell Type (Cells separated by method) | # cells in cluster | % cells in cluster for this expt. |
|-------|------------|-----------------------------|---------------------------------------|--------------------|-----------------------------------|
| PBMC1 | CEL-Seq2   | Plasmacytoid dendritic cell | B cell                                | 2                  | 0.79%                             |
| PBMC2 | Smart-seq2 | Megakaryocyte               | B cell                                | 4                  | 1.47%                             |
| PBMC2 | CEL-Seq2   | Megakaryocyte               | CD4 <sup>+</sup> T cell               | 5                  | 1.83%                             |
| PBMC2 | CEL-Seq2   | Plasmacytoid dendritic cell | B cell                                | 3                  | 1.10%                             |
| PBMC2 | Drop-seq   | Megakaryocyte               | CD4 <sup>+</sup> T cell               | 63                 | 1.87%                             |

Table s7

| <b>Method</b>                                                 | <b>Cost/cell</b> | <b># Cells</b> | <b>Time (hours)</b> |
|---------------------------------------------------------------|------------------|----------------|---------------------|
| Smart-seq2                                                    | \$ 10.59         | 384            | 25.67               |
| CEL-Seq2                                                      | \$ 3.56          | 384            | 25.17               |
| 10X Chromium (v2)                                             | \$ 0.32          | 4,000          | 9.00                |
| 10X Chromium (v3)                                             | \$ 0.33          | 4,000          | 9.00                |
| Drop-Seq/DroNc-Seq                                            | \$ 0.10          | 6,000          | 10.00               |
| Seq-Well                                                      | \$ 0.09          | 2,500          | 10.17               |
| inDrops                                                       | \$ 0.07          | 3,000          | 24.00               |
| sci-RNA-seq                                                   | \$ 0.28          | 7,680          | 17.42               |
|                                                               |                  |                |                     |
| Time is for entire process                                    |                  |                |                     |
| FACS costs not included for plate-based methods or for nuclei |                  |                |                     |

Table s8

| RNA-Seq Method                                                                                                                         | Experiment                      | Concentration (cells/ml) | Total Number of Cells | Resuspension Buffer                    | NIH3T3:HEK293 Mixed at 1:1 Ratio? |
|----------------------------------------------------------------------------------------------------------------------------------------|---------------------------------|--------------------------|-----------------------|----------------------------------------|-----------------------------------|
| Smart-seq2                                                                                                                             | Mixture1 & Mixture2 for sorting | 1,000,000                | 1,000,000             | 1X PBS                                 | Yes                               |
| CEL-Seq2                                                                                                                               |                                 |                          |                       |                                        |                                   |
| 10x Chromium (v2)                                                                                                                      | Mixture1 & Mixture2             | 1,000,000                | 10,000                | 1X PBS + 0.04% BSA                     | Yes                               |
| Drop-Seq                                                                                                                               | Mixture1 & Mixture2             | 100,000                  | 400,000               | 1X PBS + 0.01% BSA                     | Yes                               |
| Seq-Well                                                                                                                               | Mixture1 & Mixture2             | 50,000                   | 50,000                | RPMI + 10% FBS                         | Yes                               |
| inDrops                                                                                                                                | Mixture1 & Mixture2             | 100,000                  | 50,000                | 1X PBS + 15% OptiPrep                  | Yes                               |
| sci-RNA-seq                                                                                                                            | Mixture1 & Mixture2             | 1,000,000                | 2,500,000             | 1X PBS                                 | Yes                               |
| TruSeq (bulk)                                                                                                                          | Mixture1 & Mixture2             |                          | 5,000,000             | DNA/RNA Shield                         | No, each separate                 |
| Smart-seq2                                                                                                                             | PBMC1 for sorting               | 890,000                  | 1,000,000             | RPMI (without phenol) + 2% human serum | NA                                |
| CEL-Seq2                                                                                                                               |                                 |                          |                       |                                        |                                   |
| Smart-seq2                                                                                                                             | PBMC2 for sorting               | 2,100,000                | 1,800,000             | RPMI (without phenol) + 2% human serum | NA                                |
| CEL-Seq2                                                                                                                               |                                 |                          |                       |                                        |                                   |
| 10x Chromium (v2)                                                                                                                      | PBMC1 (A) & PBMC2               | 1,000,000                | 10,000                | 1X PBS + 0.04% BSA                     | NA                                |
| Drop-Seq                                                                                                                               | PBMC1 & PBMC2                   | 100,000                  | 400,000               | 1X PBS + 0.01% BSA                     | NA                                |
| Seq-Well                                                                                                                               | PBMC1 & PBMC2                   | 50,000                   | 50,000                | RPMI + 10% FBS                         | NA                                |
| inDrops                                                                                                                                | PBMC1 & PBMC2                   | 100,000                  | 50,000                | 1X PBS + 15% OptiPrep                  | NA                                |
| sci-RNA-seq                                                                                                                            | PBMC1 & PBMC2                   | 1,000,000                | 2,500,000             | 1X PBS                                 | NA                                |
| 10x Chromium (v2) and (v3)                                                                                                             | PBMC1 (B)                       | 1,000,000                | 20,000                | 1X PBS + 0.04% BSA                     | NA                                |
| TruSeq (bulk)                                                                                                                          | PBMC1                           |                          | 1,000,000             | DNA/RNA Shield                         | NA                                |
| TruSeq (bulk)                                                                                                                          | PBMC2                           |                          | 1,800,000             | DNA/RNA Shield                         | NA                                |
| Smart-seq2                                                                                                                             | Cortex1 for sorting             | 7,000,000                | 6,510,000             | 1X PBS + 1% BSA                        | NA                                |
| 10x Chromium (v2)                                                                                                                      |                                 |                          |                       |                                        |                                   |
| Smart-seq2                                                                                                                             | Cortex2 for sorting             | 5,400,000                | 4,590,000             | 1X PBS + 1% BSA                        | NA                                |
| 10x Chromium (v2)                                                                                                                      |                                 |                          |                       |                                        |                                   |
| DroNc-Seq                                                                                                                              | Cortex1                         | 300,000                  | 750,000               | 1X PBS + 0.01% BSA                     | NA                                |
| DroNc-Seq                                                                                                                              | Cortex2                         | 360,000                  | 900,000               | 1X PBS + 0.01% BSA                     | NA                                |
| sci-RNA-seq                                                                                                                            | Cortex1                         | 300,000                  | 450,000               | 1X PBS + 1% BSA                        | NA                                |
| sci-RNA-seq                                                                                                                            | Cortex2                         | 540,000                  | 810,000               | 1X PBS + 1% BSA                        | NA                                |
| TruSeq (bulk)                                                                                                                          | Cortex1                         |                          | 1,000,000             | DNA/RNA Shield                         | NA                                |
| TruSeq (bulk)                                                                                                                          | Cortex2                         |                          | 720,000               | DNA/RNA Shield                         | NA                                |
|                                                                                                                                        |                                 |                          |                       |                                        |                                   |
| NA: Not applicable                                                                                                                     |                                 |                          |                       |                                        |                                   |
| We list the number of cells actually used, although in many cases, we may not have needed all of the cells to complete the experiment. |                                 |                          |                       |                                        |                                   |



Table s9

| Experiment # | Cell Source                                                                                 | Date Thawed | RNA-Seq Date | Time in Culture from Thaw -> RNA-Seq | Total time in culture | Passage Number                                       |
|--------------|---------------------------------------------------------------------------------------------|-------------|--------------|--------------------------------------|-----------------------|------------------------------------------------------|
| 1            | fresh frozen NIH3T3 & HEK293 ATCC vials                                                     | 6/9/2017    | 6/26/2017    | 18 days                              | 18 days               | Both P4 (thawed fresh ATCC cells - considered as P0) |
| 2            | 2x NIH3T3 & HEK293 vials (2.5e6 cells, both P3) frozen on 6/17/17 (after 9 days in culture) | 10/19/2017  | 10/31/2017   | 13 days                              | 22 days               | NIH3T3: P7; HEK293: P6                               |

Table s10

| Sequencing Platform                                                           | Flow Cell | Sample                           | Library Types                                                   | Number of lanes | Read 1 (bases) | Read 2 (bases) | Index 1 (bases) | Index 2 (bases) | Custom Sequencing Primer | PhiX added |
|-------------------------------------------------------------------------------|-----------|----------------------------------|-----------------------------------------------------------------|-----------------|----------------|----------------|-----------------|-----------------|--------------------------|------------|
| HiSeq2500 high capacity                                                       | CAPTEANXX | Mixture1                         | Smart-seq2, CEL-Seq2, 10x (v2), Drop-Seq, Seq-Well, sci-RNA-Seq | 7               | 50             | 50             | 10              | 10              | for Read 1               | none       |
| HiSeq2500 high capacity                                                       | CAPTEANXX | Mixture1                         | inDrops                                                         | 1               | 50             | 50             | 10              | 10              |                          | none       |
| HiSeq2500 high capacity                                                       | CBU1CANXX | Mixture2                         | Smart-seq2, CEL-Seq2, 10x (v2), Drop-Seq, Seq-Well, sci-RNA-Seq | 8               | 50             | 50             | 10              | 10              | for Read 1               | none       |
| HiSeq2500 rapid run                                                           | HYK72BCXY | Mixture2                         | inDrops                                                         | 1               | 100            | 94             | 8               | 8               |                          | 5%         |
| HiSeq2500 rapid run                                                           | H5VV5BCX2 | Mixed2                           | Seq-Well                                                        | 1               | 100            | 94             | 8               | 8               | for Read 1               | 5%         |
| HiSeq2500 high capacity                                                       | CC7W2ANXX | PBMC1                            | Smart-seq2, CEL-Seq2, 10x (v2), Drop-Seq, sci-RNA-Seq           | 8               | 50             | 50             | 10              | 10              | for Read 1               | none       |
| HiSeq2500 rapid run                                                           | H5VV5BCX2 | PBMC1                            | inDrops                                                         | 1               | 100            | 94             | 8               | 8               |                          | 5%         |
| HiSeq2500 high capacity                                                       | CC86JANXX | PBMC2                            | Smart-seq2, CEL-Seq2, 10x (v2), Drop-Seq, Seq-Well, sci-RNA-Seq | 7               | 50             | 50             | 10              | 10              | for Read 1               | none       |
| HiSeq2500 high capacity                                                       | CC86JANXX | PBMC2                            | inDrops                                                         | 1               | 50             | 50             | 10              | 10              |                          | 5%         |
| HiSeq2500 high capacity                                                       | CCJ15ANXX | Cortex1                          | Smart-seq2, 10x (v2), sci-RNA-Seq                               | 4               | 50             | 50             | 10              | 10              |                          | none       |
| HiSeq2500 high capacity                                                       | CCJ15ANXX | Cortex2                          | Smart-seq2, 10x (v2), sci-RNA-Seq                               | 4               | 50             | 50             | 10              | 10              |                          | none       |
| HiSeq2500 high capacity                                                       | CCKVLANXX | Cortex1                          | Smart-seq2, 10x (v2), DroNc-Seq, sci-RNA-Seq                    | 4               | 50             | 50             | 10              | 10              | for Read 1               | none       |
| HiSeq2500 high capacity                                                       | CCKVLANXX | Cortex2                          | Smart-seq2, 10x (v2), DroNc-Seq, sci-RNA-Seq                    | 4               | 50             | 50             | 10              | 10              | for Read 1               | none       |
| HiSeq2500 rapid run                                                           | HJTJGBCX2 | Mixture1, Mixture2, PBMC1, PBMC2 | inDrops                                                         | 2               | 50             | 19             | 8               | 8               |                          | 10%        |
| HiSeq2500 rapid run                                                           | HKGWKBCX2 | PBMC1                            | Seq-Well                                                        | 2               | 20             | 50             | 8               | 0               | for Read 1               |            |
| HiSeq2500 rapid run                                                           | HKGWFBCX2 | PBMC1, PBMC2                     | inDrops                                                         | 2               | 50             | 19             | 8               | 8               |                          | 10%        |
| HiSeq2500 rapid run                                                           | HKH3FBCX2 | PBMC1, PBMC2                     | inDrops                                                         | 2               | 50             | 19             | 8               | 8               |                          | 10%        |
| HiSeq2500 high capacity                                                       | CCLBDANXX | PBMC2                            | Drop-Seq                                                        | 2               | 31             | 50             | 8               | 0               | for Read 1               | 10%        |
| HiSeq2500 high capacity                                                       | CCLBDANXX | PBMC1, Cortex1                   | Drop-Seq (P1), Seq-Well (P1), DroNc-Seq (C1)                    | 3               | 31             | 50             | 8               | 0               | for Read 1               | 10%        |
| HiSeq2500 high capacity                                                       | CCLBDANXX | PBMC1, PBMC2, Cortex2            | 10x (v2) (P1), Drop-Seq (P1&P2), CEL-Seq2 (P2), DroNc-Seq (C2)  | 3               | 31             | 50             | 8               | 0               | for Read 1               | 10%        |
| HiSeq2500 high capacity                                                       | CD370ANXX | PBMC1                            | 10x (v2), 10x (v3)                                              | 8               | 33             | 50             | 8               | 0               | for Read 1               | 10%        |
| Other libraries not included in this study were also sequenced in some lanes. |           |                                  |                                                                 |                 |                |                |                 |                 |                          |            |

Table s11

| Library Types                                                                                                                                                                                        | Flow Cell(s)                                                     | Sample                                             | Read 1 length | Read 2 length | Index 1 length | Index 2 length | Read 1 trimmed | Read 2 trimmed | Index 1 trimmed | Index 2 trimmed | In-line index position | UMI position   | PolyT start position | Cell barcodes             |
|------------------------------------------------------------------------------------------------------------------------------------------------------------------------------------------------------|------------------------------------------------------------------|----------------------------------------------------|---------------|---------------|----------------|----------------|----------------|----------------|-----------------|-----------------|------------------------|----------------|----------------------|---------------------------|
| Smart-seq2                                                                                                                                                                                           | CAPTEANXX, CBU1CANXX, CC7W2ANXX, CC86JANXX, CCKVLANXX, CCJ15ANXX | Mixture1, Mixture2, PBMC1, PBMC2, Cortex1, Cortex2 | 50            | 50            | 10             | 10             | 0              | 0              | 2               | 2               | none                   | none           | none                 | index 1, index 2          |
| CEL-Seq2                                                                                                                                                                                             | CAPTEANXX, CBU1CANXX, CC7W2ANXX, CC86JANXX                       | Mixture1, Mixture2, PBMC1, PBMC2                   | 50            | 50            | 10             | 10             | 38             | 0              | 2               | 10              | Read 1, #7-12          | Read 1, #1-6   | Read 1, #13          | In-line                   |
| CEL-Seq2                                                                                                                                                                                             | CCLBDANXX                                                        | PBMC2                                              | 31            | 50            | 8              | 0              | 19             | 0              | 0               | 0               | Read 1, #7-12          | Read 1, #1-6   | Read 1, #13          | In-line                   |
| 10x Chromium (v2)                                                                                                                                                                                    | CAPTEANXX, CBU1CANXX, CC7W2ANXX, CC86JANXX, CCKVLANXX, CCJ15ANXX | Mixture1, Mixture2, PBMC1, PBMC2, Cortex1, Cortex2 | 50            | 50            | 10             | 10             | 24             | 0              | 2               | 10              | Read 1, #1-16          | Read 1, #17-26 | Read 1, #27          | In-line                   |
| 10x Chromium (v2)                                                                                                                                                                                    | CCLBDANXX                                                        | PBMC1, PBMC2                                       | 31            | 50            | 8              | 0              | 5              | 0              | 0               | 0               | Read 1, #1-16          | Read 1, #17-26 | Read 1, #27          | In-line                   |
| 10x Chromium (v2)                                                                                                                                                                                    | CD370ANXX                                                        | PBMC1                                              | 33            | 50            | 8              | 0              | 7              | 0              | 0               | 0               | Read 1, #1-16          | Read 1, #17-26 | Read 1, #27          | In-line                   |
| 10x Chromium (v3)                                                                                                                                                                                    | CD370ANXX                                                        | PBMC1                                              | 33            | 50            | 8              | 0              | 5              | 0              | 0               | 0               | Read 1, #1-16          | Read 1, #17-28 | Read 1, #29          | In-line                   |
| Drop-seq                                                                                                                                                                                             | CAPTEANXX, CBU1CANXX, CC7W2ANXX, CC86JANXX                       | Mixture1, Mixture2, PBMC1, PBMC2                   | 50            | 50            | 10             | 10             | 30             | 0              | 2               | 10              | Read 1, #1-12          | Read 1, #13-20 | Read 1, #21          | In-line                   |
| Drop-seq                                                                                                                                                                                             | CCLBDANXX                                                        | PBMC1, PBMC2                                       | 31            | 50            | 8              | 0              | 11             | 0              | 0               | 0               | Read 1, #1-12          | Read 1, #13-20 | Read 1, #21          | In-line                   |
| DroNc-seq                                                                                                                                                                                            | CCKVLANXX                                                        | Cortex1, Cortex2                                   | 50            | 50            | 10             | 10             | 30             | 0              | 2               | 10              | Read 1, #1-12          | Read 1, #13-20 | Read 1, #21          | In-line                   |
| DroNc-seq                                                                                                                                                                                            | CCLBDANXX                                                        | Cortex1, Cortex2                                   | 31            | 50            | 8              | 0              | 11             | 0              | 0               | 0               | Read 1, #1-12          | Read 1, #13-20 | Read 1, #21          | In-line                   |
| Seq-Well                                                                                                                                                                                             | CAPTEANXX, CBU1CANXX                                             | Mixture1, Mixture2                                 | 50            | 50            | 10             | 10             | 30             | 0              | 2               | 10              | Read 1, #1-12          | Read 1, #13-20 | Read 1, #21          | In-line                   |
| Seq-Well                                                                                                                                                                                             | HSV5BCX2                                                         | Mixture2                                           | 100           | 94            | 8              | 8              | 80             | 0              | 0               | 8               | Read 1, #1-12          | Read 1, #13-20 | Read 1, #21          | In-line                   |
| Seq-Well                                                                                                                                                                                             | HKGWKBCX2                                                        | PBMC1                                              | 20            | 50            | 8              | 0              | 0              | 0              | 0               | 0               | Read 1, #1-12          | Read 1, #13-20 | Not sequenced        | In-line                   |
| Seq-Well                                                                                                                                                                                             | CCLBDANXX                                                        | PBMC1                                              | 31            | 50            | 8              | 0              | 11             | 0              | 0               | 0               | Read 1, #1-12          | Read 1, #13-20 | Read 1, #21          | In-line                   |
| Seq-Well                                                                                                                                                                                             | CC86JANXX                                                        | PBMC2                                              | 50            | 50            | 10             | 10             | 30             | 0              | 2               | 10              | Read 1, #1-12          | Read 1, #13-20 | Read 1, #21          | In-line                   |
| inDrops                                                                                                                                                                                              | CAPTEANXX, CC86JANXX                                             | Mixture1, PBMC2                                    | 50            | 50            | 10             | 10             | 0              | 36             | 2               | 2               | Read 2, #1-8           | Read 2, #9-14  | Read 2, #15          | In-line, index 1, index 2 |
| inDrops                                                                                                                                                                                              | HJTJGBCX2                                                        | Mixture1, Mixture2                                 | 50            | 19            | 8              | 8              | 0              | 5              | 0               | 0               | Read 2, #1-8           | Read 2, #9-14  | Read 2, #15          | In-line, index 1, index 2 |
| inDrops                                                                                                                                                                                              | HYK72BCXY, HSV5BCX2                                              | Mixture2, PBMC1                                    | 100           | 94            | 8              | 8              | 0              | 80             | 0               | 0               | Read 2, #1-8           | Read 2, #9-14  | Read 2, #15          | In-line, index 1, index 2 |
| inDrops                                                                                                                                                                                              | HJTJGBCX2, HKGWFBXCX2, HKH3FBCX2                                 | PBMC1                                              | 50            | 19            | 8              | 8              | 0              | 5              | 0               | 0               | Read 2, #1-8           | Read 2, #9-14  | Read 2, #15          | In-line, index 1, index 2 |
| inDrops                                                                                                                                                                                              | HJTJGBCX2, HKGWFBXCX2, HKH3FBCX2                                 | PBMC2                                              | 50            | 19            | 8              | 8              | 0              | 5              | 0               | 0               | Read 2, #1-8           | Read 2, #9-14  | Read 2, #15          | In-line, index 1, index 2 |
| sci-RNA-seq                                                                                                                                                                                          | CAPTEANXX, CBU1CANXX, CCKVLANXX, CCJ15ANXX                       | Mixture1, Mixture2, Cortex1, Cortex2               | 50            | 50            | 10             | 10             | 32             | 0              | 0               | 0               | Read 1, #9-18          | Read 1, #1-8   | Read 1, #19          | In-line, index 1, index 2 |
|                                                                                                                                                                                                      |                                                                  |                                                    |               |               |                |                |                |                |                 |                 |                        |                |                      |                           |
| Bases listed for total and trimmed read lengths                                                                                                                                                      |                                                                  |                                                    |               |               |                |                |                |                |                 |                 |                        |                |                      |                           |
| sci-RNA-seq reads were demultiplexed such that the cells from the same well in the RT step were in the same fastq file; we therefore only used the in-line RT cell barcodes for down-stream analysis |                                                                  |                                                    |               |               |                |                |                |                |                 |                 |                        |                |                      |                           |

Table s12

| Cell type           | Gene   | Positive or Negative |
|---------------------|--------|----------------------|
| CD4+ T cell         | CD3D   | +                    |
| CD4+ T cell         | CD3E   | +                    |
| CD4+ T cell         | CD3G   | +                    |
| CD4+ T cell         | TRAC   | +                    |
| CD4+ T cell         | CD4    | +                    |
| CD4+ T cell         | TCF7   | +                    |
| CD4+ T cell         | CD27   | +                    |
| CD4+ T cell         | IL7R   | +                    |
| CD4+ T cell         | CD8A   | -                    |
| CD4+ T cell         | CD8B   | -                    |
| CD4+ T cell         | GNLY   | -                    |
| CD4+ T cell         | NKG7   | -                    |
| CD4+ T cell         | CST7   | -                    |
| Cytotoxic T cell    | CD3D   | +                    |
| Cytotoxic T cell    | CD3E   | +                    |
| Cytotoxic T cell    | CD3G   | +                    |
| Cytotoxic T cell    | TRAC   | +                    |
| Cytotoxic T cell    | CD8A   | +                    |
| Cytotoxic T cell    | CD8B   | +                    |
| Cytotoxic T cell    | GZMK   | +                    |
| Cytotoxic T cell    | CCL5   | +                    |
| Cytotoxic T cell    | NKG7   | +                    |
| Cytotoxic T cell    | CD4    | -                    |
| Cytotoxic T cell    | FCER1G | -                    |
| B cell              | CD19   | +                    |
| B cell              | MS4A1  | +                    |
| B cell              | CD79A  | +                    |
| B cell              | CD79B  | +                    |
| B cell              | MZB1   | +                    |
| B cell              | IGHD   | +                    |
| B cell              | IGHM   | +                    |
| Natural killer cell | NCAM1  | +                    |
| Natural killer cell | NKG7   | +                    |
| Natural killer cell | KLRB1  | +                    |
| Natural killer cell | KLRD1  | +                    |
| Natural killer cell | KLRF1  | +                    |
| Natural killer cell | KLRC1  | +                    |
| Natural killer cell | KLRC2  | +                    |
| Natural killer cell | KLRC3  | +                    |
| Natural killer cell | KLRC4  | +                    |
| Natural killer cell | CD3D   | -                    |
| Natural killer cell | CD3E   | -                    |
| Natural killer cell | CD3G   | -                    |
| Natural killer cell | CD14   | -                    |
| Natural killer cell | FCGR3A | +                    |
| Natural killer cell | FCGR3B | +                    |

Table s12

|                     |         |   |
|---------------------|---------|---|
| Natural killer cell | ITGAL   | + |
| Natural killer cell | ITGAM   | + |
| Natural killer cell | FCER1G  | + |
| Natural killer cell | TRAC    | - |
| CD14+ monocyte      | VCAN    | + |
| CD14+ monocyte      | FCN1    | + |
| CD14+ monocyte      | S100A8  | + |
| CD14+ monocyte      | S100A9  | + |
| CD14+ monocyte      | CD14    | + |
| CD14+ monocyte      | ITGAL   | + |
| CD14+ monocyte      | ITGAM   | + |
| CD14+ monocyte      | CSF3R   | + |
| CD14+ monocyte      | CSF1R   | + |
| CD14+ monocyte      | CX3CR1  | + |
| CD14+ monocyte      | FCGR3A  | - |
| CD14+ monocyte      | FCGR3B  | - |
| CD14+ monocyte      | TYROBP  | + |
| CD14+ monocyte      | LYZ     | + |
| CD14+ monocyte      | S100A12 | + |
| CD14+ monocyte      | CD3D    | - |
| CD14+ monocyte      | CD3E    | - |
| CD14+ monocyte      | CD3G    | - |
| CD14+ monocyte      | TRAC    | - |
| CD14+ monocyte      | NKG7    | - |
| CD14+ monocyte      | KLRB1   | - |
| CD14+ monocyte      | KLRD1   | - |
| CD16+ monocyte      | FCN1    | + |
| CD16+ monocyte      | FCGR3A  | + |
| CD16+ monocyte      | FCGR3B  | + |
| CD16+ monocyte      | ITGAL   | + |
| CD16+ monocyte      | ITGAM   | + |
| CD16+ monocyte      | CSF3R   | + |
| CD16+ monocyte      | CSF1R   | + |
| CD16+ monocyte      | CX3CR1  | + |
| CD16+ monocyte      | CDKN1C  | + |
| CD16+ monocyte      | MS4A7   | + |
| CD16+ monocyte      | S100A8  | - |
| CD16+ monocyte      | S100A9  | - |
| CD16+ monocyte      | S100A12 | - |
| CD16+ monocyte      | CD14    | - |
| CD16+ monocyte      | CD3D    | - |
| CD16+ monocyte      | CD3E    | - |
| CD16+ monocyte      | CD3G    | - |
| CD16+ monocyte      | TRAC    | - |
| CD16+ monocyte      | NKG7    | - |
| CD16+ monocyte      | KLRB1   | - |
| CD16+ monocyte      | KLRD1   | - |

Table s12

|                             |          |   |
|-----------------------------|----------|---|
| Dendritic cell              | HLA-DPB1 | + |
| Dendritic cell              | HLA-DPA1 | + |
| Dendritic cell              | HLA-DQA1 | + |
| Dendritic cell              | ITGAX    | + |
| Dendritic cell              | CD3D     | - |
| Dendritic cell              | CD3E     | - |
| Dendritic cell              | CD3G     | - |
| Dendritic cell              | NCAM1    | - |
| Dendritic cell              | CD19     | - |
| Dendritic cell              | CD14     | - |
| Dendritic cell              | CD1C     | + |
| Dendritic cell              | CD1E     | + |
| Dendritic cell              | FCER1A   | + |
| Dendritic cell              | CLEC10A  | + |
| Dendritic cell              | FCGR2B   | + |
| Dendritic cell              | MS4A1    | - |
| Dendritic cell              | CD79A    | - |
| Dendritic cell              | CD79B    | - |
| Plasmacytoid dendritic cell | IL3RA    | + |
| Plasmacytoid dendritic cell | GZMB     | + |
| Plasmacytoid dendritic cell | JCHAIN   | + |
| Plasmacytoid dendritic cell | IRF7     | + |
| Plasmacytoid dendritic cell | TCF4     | + |
| Plasmacytoid dendritic cell | LILRA4   | + |
| Plasmacytoid dendritic cell | CLEC4C   | + |
| Plasmacytoid dendritic cell | ITGAX    | - |
| Plasmacytoid dendritic cell | CD3D     | - |
| Plasmacytoid dendritic cell | CD3E     | - |
| Plasmacytoid dendritic cell | CD3G     | - |
| Plasmacytoid dendritic cell | NCAM1    | - |
| Plasmacytoid dendritic cell | CD19     | - |
| Plasmacytoid dendritic cell | CD14     | - |
| Plasmacytoid dendritic cell | MS4A1    | - |
| Plasmacytoid dendritic cell | CD79A    | - |
| Plasmacytoid dendritic cell | CD79B    | - |
| Plasma cell                 | CD38     | + |
| Plasma cell                 | XBP1     | + |
| Plasma cell                 | CD27     | + |
| Plasma cell                 | SLAMF7   | + |
| Plasma cell                 | CD19     | - |
| Plasma cell                 | MS4A1    | - |
| Plasma cell                 | CD3D     | - |
| Plasma cell                 | CD3E     | - |
| Plasma cell                 | CD3G     | - |
| Plasma cell                 | IGHA1    | + |
| Plasma cell                 | IGHA2    | + |
| Plasma cell                 | IGHG1    | + |

Table s12

|               |        |   |
|---------------|--------|---|
| Plasma cell   | IGHG2  | + |
| Plasma cell   | IGHG3  | + |
| Plasma cell   | IGHG4  | + |
| Megakaryocyte | PF4    | + |
| Megakaryocyte | PPBP   | + |
| Megakaryocyte | GP5    | + |
| Megakaryocyte | ITGA2B | + |
| Megakaryocyte | NRGN   | + |
| Megakaryocyte | TUBB1  | + |
| Megakaryocyte | SPARC  | + |
| Megakaryocyte | RGS18  | + |
| Megakaryocyte | MYL9   | + |
| Megakaryocyte | GNG11  | + |

Table s13

| Cell type                 | Gene    | Positive or Negative |
|---------------------------|---------|----------------------|
| Astrocyte                 | Slc1a3  | +                    |
| Astrocyte                 | Aqp4    | +                    |
| Astrocyte                 | Gja1    | +                    |
| Astrocyte                 | F3      | +                    |
| Astrocyte                 | Aldoc   | +                    |
| Astrocyte                 | Fgfr3   | +                    |
| Excitatory neuron         | Slc17a7 | +                    |
| Excitatory neuron         | Neurod6 | +                    |
| Excitatory neuron         | Neurod2 | +                    |
| Excitatory neuron         | Tbr1    | +                    |
| Excitatory neuron         | Satb2   | +                    |
| Excitatory neuron         | Cbln2   | +                    |
| Excitatory neuron         | Slc17a6 | +                    |
| Inhibitory neuron         | Gad1    | +                    |
| Inhibitory neuron         | Gad2    | +                    |
| Inhibitory neuron         | Dlx1    | +                    |
| Inhibitory neuron         | Dlx2    | +                    |
| Inhibitory neuron         | Slc32a1 | +                    |
| Inhibitory neuron         | Erbp4   | +                    |
| Microglia                 | Csf1r   | +                    |
| Microglia                 | C1qa    | +                    |
| Microglia                 | Aif1    | +                    |
| Microglia                 | Tmem119 | +                    |
| Microglia                 | Ctss    | +                    |
| Microglia                 | C1qb    | +                    |
| Microglia                 | Tyrobp  | +                    |
| Microglia                 | Laptm5  | +                    |
| Oligodendrocyte           | Olig1   | +                    |
| Oligodendrocyte           | Olig2   | +                    |
| Oligodendrocyte           | Mog     | +                    |
| Oligodendrocyte           | Mbp     | +                    |
| Oligodendrocyte           | Mobp    | +                    |
| Oligodendrocyte           | Plp1    | +                    |
| Oligodendrocyte           | Sox10   | +                    |
| Oligodendrocyte           | Gpr37   | +                    |
| Oligodendrocyte           | Mag     | +                    |
| Oligodendrocyte           | Cnp     | +                    |
| Oligodendrocyte Precursor | Pdgfra  | +                    |
| Oligodendrocyte Precursor | Cspg4   | +                    |
| Oligodendrocyte Precursor | Olig1   | +                    |
| Oligodendrocyte Precursor | Olig2   | +                    |
| Oligodendrocyte Precursor | Rlbp1   | +                    |
| Oligodendrocyte Precursor | C1ql1   | +                    |
| Endothelial cell          | Flt1    | +                    |
| Endothelial cell          | Id1     | +                    |
| Endothelial cell          | Foxf2   | +                    |



Table s13

|                  |         |   |
|------------------|---------|---|
| Endothelial cell | Foxq1   | + |
| Endothelial cell | Lef1    | + |
| Endothelial cell | Cldn5   | + |
| Endothelial cell | Zic3    | + |
| Endothelial cell | Ocln    | + |
| Pericyte         | Vtn     | + |
| Pericyte         | Pdgfrb  | + |
| Pericyte         | Atp13a5 | + |
| Pericyte         | Rgs5    | + |
| Pericyte         | Kcnj8   | + |
| Pericyte         | Des     | + |

Table s14

| Method              | Replicate | # nearest neighbors | variable.gene | resolution | # PCs |
|---------------------|-----------|---------------------|---------------|------------|-------|
| Smart-seq2          | PBMC1     | 5                   | FALSE         | 0.5        | 20    |
| CEL-Seq2            | PBMC1     | 5                   | FALSE         | 0.5        | 20    |
| 10x Chromium (v2) A | PBMC1     | 30                  | FALSE         | 1.5        | 30    |
| 10x Chromium (v2) B | PBMC1     | 15                  | TRUE          | 0.8        | 20    |
| 10x Chromium (v3)   | PBMC1     | 30                  | TRUE          | 0.8        | 30    |
| Drop-seq            | PBMC1     | 15                  | FALSE         | 1          | 30    |
| Seq-Well            | PBMC1     | 15                  | TRUE          | 1.5        | 30    |
| inDrops             | PBMC1     | 30                  | TRUE          | 1.2        | 30    |
|                     |           |                     |               |            |       |
| Smart-seq2          | PBMC2     | 5                   | FALSE         | 0.5        | 20    |
| CEL-Seq2            | PBMC2     | 5                   | TRUE          | 0.5        | 20    |
| 10x Chromium (v2)   | PBMC2     | 30                  | TRUE          | 1.5        | 50    |
| Drop-seq            | PBMC2     | 30                  | TRUE          | 0.8        | 20    |
| Seq-Well            | PBMC2     | 15                  | FALSE         | 1.2        | 30    |
| inDrops             | PBMC2     | 15                  | TRUE          | 1.5        | 20    |
|                     |           |                     |               |            |       |
| Smart-seq2          | Cortex1   | 5                   | TRUE          | 1.5        | 30    |
| 10x Chromium (v2)   | Cortex1   | 30                  | FALSE         | 1.2        | 20    |
| DroNc-seq           | Cortex1   | 10                  | FALSE         | 1.5        | 50    |
| sci-RNA-seq         | Cortex1   | 30                  | FALSE         | 1.2        | 20    |
|                     |           |                     |               |            |       |
| Smart-seq2          | Cortex2   | 5                   | TRUE          | 1          | 20    |
| 10x Chromium (v2)   | Cortex2   | 30                  | TRUE          | 0.8        | 100   |
| DroNc-seq           | Cortex2   | 5                   | TRUE          | 0.5        | 30    |
| sci-RNA-seq         | Cortex2   | 30                  | TRUE          | 1          | 100   |
